# COVID-19 Neuropathology: evidence for SARS-CoV-2 invasion of Human Brainstem Nuclei

## Abstract

Neurological manifestations are common in COVID-19, the disease caused by SARS-CoV-2. Despite reports of SARS-CoV-2 detection in the brain and cerebrospinal fluid of COVID-19 patients, it's still unclear whether the virus can infect the central nervous system, and which neuropathological alterations can be ascribed to viral tropism, rather than immune-mediated mechanisms.

Here, we assess neuropathological alterations in 24 COVID-19 patients and 18 matched controls who died due to pneumonia / respiratory failure. Aside from a wide spectrum of neuropathological alterations, SARS-CoV-2-immunoreactive neurons were detected in specific brainstem nuclei of 5 COVID-19 subjects. Viral RNA was also detected by real-time RT-PCR. Quantification of reactive microglia revealed an anatomically segregated pattern of inflammation within affected brainstem regions, and was higher when compared to controls. While the results of this study support the neuroinvasive potential of SARS-CoV-2, the role of SARS-CoV-2 neurotropism in COVID-19 and its long-term sequelae require further investigation.

## 24 **Introduction**

25 Neurological manifestations are common in coronavirus disease 19 (COVID-19), the  
26 disease caused by severe acute respiratory syndrome coronavirus-2 (SARS-CoV-2)<sup>1-5</sup>.  
27 Symptoms range from anosmia, ageusia, dizziness and headache, which are commonly  
28 reported by patients with mild disease, to altered mental status, neuropsychiatric disorders,  
29 stroke, and, rarely, meningitis, encephalitis, and polyneuritis, which occur in hospitalized  
30 patients with severe disease<sup>1,5</sup>. Between 10 to 30% of people with SARS-CoV-2 infection  
31 experience long-term sequelae, referred as “long COVID”, including neurological  
32 manifestations such as hyposmia, hypogeusia, headaches, fatigue, sleep disorders, pain,  
33 and cognitive impairment<sup>3</sup>. Despite some reports of detection of SARS-CoV-2 in the brain  
34 and cerebrospinal fluid of patients with COVID-19<sup>2-3,6</sup>, it is still unclear whether the virus can  
35 infect the central nervous system (CNS). In particular, it still remains to be elucidated  
36 whether neurological manifestations and neural damage are a direct consequence of viral  
37 invasion of the CNS, are due to post-infectious immune-mediated disease, or are the result  
38 of systemic disease<sup>1,6-11</sup>. Studies on human neural cell cultures and brain organoids report  
39 conflicting data on SARS-CoV-2 neurotropism<sup>12</sup>. Overall, they suggest that SARS-CoV-2  
40 does not infect and replicate efficiently in human neural cells, while it can replicate at high  
41 rates in choroid plexus epithelial cells<sup>7,13-14</sup>. At variance, intranasal inoculation of SARS-  
42 CoV-2 in transgenic mice overexpressing human ACE2 under the K18 promoter resulted in  
43 brain invasion and widespread infection of neurons, radial glia and neuronal progenitor  
44 cells<sup>15-16</sup>. Other coronaviruses, such as SARS-CoV and MERS-CoV, appear to be able to  
45 infect the CNS in both humans and animal models<sup>17</sup>.

46 Data deriving from large autopsy studies in patients who died from COVID-19 suggest for  
47 the neuroinvasive potential of SARS-CoV-2 in the CNS<sup>8-9,17</sup>, even though infection appears  
48 to be limited to sparse cells in the brainstem and not associated with encephalitis or other

49 specific changes referable to the virus<sup>8</sup>. Conversely, other studies failed to detect SARS-  
50 CoV-2 antigens or genomic sequences in brain tissues of COVID-19 patients<sup>11,17-18,37-38</sup>. In  
51 numerous instances, neuropathological changes in the brains of COVID-19 patients were  
52 moderate and mainly represented by ischaemic lesions, astrogliosis, microglial nodules, and  
53 cytotoxic T lymphocyte infiltrates, most pronounced in the brainstem, cerebellum, and  
54 meninges<sup>8-9,11,18,21</sup>. While diffuse to focal hypoxic / ischaemic damage was a common finding  
55 in COVID-19 patients across studies, no direct link between encountered neuropathological  
56 alterations and direct viral invasion could be established, with systemic inflammation and  
57 hypoxia playing a likely major role in mediating brain immune response<sup>37</sup>. Single-nucleus  
58 gene-expression profiling of frontal cortex and choroid plexus tissues from severe COVID-  
59 19 patients showed broad perturbations, with upregulation of genes involved in innate  
60 antiviral response and inflammation, microglia activation and neurodegeneration<sup>20</sup>, but no  
61 direct evidence of viral tropism was found; similarly, Fullard et al.<sup>38</sup> were unable to detect  
62 viral transcripts and S proteins in different brain regions of COVID-19 subjects. Deep spatial  
63 profiling of the local immune response in COVID-19 brains through imaging mass  
64 spectrometry revealed significant immune activation in the CNS with pronounced  
65 neuropathological changes (astrocytosis, axonal damage, and blood-brain-barrier leakage)  
66 and detected viral antigen in ACE2-positive cells enriched in the vascular compartment<sup>18</sup>.  
67 According to the study, the presence of viral antigen was linked to vascular proximity and  
68 ACE2 expression, while also being correlated to the perivascular immune activation patterns  
69 of CD8 and CD4 T cells and myeloid- and microglial-cell subsets<sup>18</sup>, indicating a fundamental  
70 role of the vascular and perivascular compartment, as well as Blood-brain-barrier  
71 impairment, in mediating COVID-19 specific neuropathological changes. As evidenced by  
72 the above case series, and considering the different case reports available<sup>22-24</sup>, SARS-CoV-  
73 2 infection of CNS seems to be limited to isolated cells within the perivascular compartment  
74 of the brainstem and olfactory bulb, and have been reported in a subset of cases in the

75 various autopsy series, while widespread neuropathological sequelae (such as astrogliosis,  
76 microgliosis, lymphocyte infiltration, microvascular injury, fibrinogen leakage) have been  
77 documented in most examined specimens. The possibility of direct viral invasion, and  
78 eventual associated long-term sequelae of infection, remain to be investigated.

79 In the present study, we assess the neuropathological changes of 24 patients who died  
80 following a diagnosis of SARS-CoV-2 infection in Italy during the COVID-19 pandemic (from  
81 March 2020 to May 2021) and 18 age-matched controls with comparable medical conditions  
82 who died mainly due to pneumonia and / or respiratory failure.

### 83 **Study design and Materials**

84 Hospitalized patients who died following a diagnosis of SARS-CoV-2 infection in the Veneto  
85 Region, Italy, during the peak incidence of COVID-19 (from March 2020 to May 2021) were  
86 autopsied according to established COVID-19 infection security protocols. Inclusion criteria  
87 for the study were: a) diagnosis of SARS-CoV-2 infection confirmed by molecular testing of  
88 rhino-pharyngeal swabs and b) high-quality brain tissue samples available for  
89 histopathological and immunohistochemical analysis. Tissue quality was determined by  
90 Post-Mortem Interval (PMI)  $\leq 5$  days, absence of tissue maceration, fixation time  $\leq 3$  weeks  
91 and adequate formalin penetration within the tissue. A total of 24 COVID-19 patients were  
92 included in the study.

93 18 age- and sex-matched subjects with comparable general medical conditions, predating  
94 the COVID-19 pandemic in Italy, were included as controls.

### 95 **Methods**

96 *Clinical information.* Available clinical data for COVID-19 subjects and controls were  
97 examined, including ante-mortem medical history, neurological and neuroradiological  
98 findings, hospitalization time, ICU and oxygen therapy status, and prescribed medication.

99 However, as most subjects died during the sanitary emergency of the first wave of the  
100 COVID-19 pandemic in Italy, ante-mortem clinical data were at times limited, especially  
101 when concerning post-hospitalization neurological status. This represents one of the main  
102 limitations of our study, determining significant constrains to the association between ante-  
103 mortem neurological findings and encountered neuropathological alterations, which is often  
104 not unequivocal.

105 *Sampling and fixation procedures.* Sampled brains were immersion fixed in 4% phosphate-  
106 buffered formalin solution following autopsy (mean PMI: 3 days; Range 0-5 days; average  
107 fixation time: 2-3 weeks) and subsequently sectioned for histopathological and  
108 immunohistochemical analysis. Samples of the cerebral cortex, basal ganglia,  
109 hippocampus, cerebellar cortex, deep cerebellar nuclei, choroid plexuses and meninges  
110 were obtained, while the brainstem was isolated at the level of the rostral extremity of the  
111 midbrain and extensively sampled in its whole cranio-caudal extent. The 12 cranial nerves,  
112 where available, including the olfactory bulb, tract and bifurcation, were also sampled. To  
113 preserve antigen quality, a slow dehydration and clearing protocol was performed prior to  
114 paraffin embedding (24h mean tissue processing time).

115 *Histochemical and immunoperoxidase staining.* Haematoxylin and Eosin staining was  
116 employed for routine histopathological evaluation. Immunoperoxidase staining was  
117 performed on a Dako EnVision Autostainer (Dako Denmark A/S, Glostrup, Denmark)  
118 according to manufacturer recommendations. Antibodies for CD3 (Polyclonal Rabbit Anti-  
119 Human, Citrate Buffer HIER, dilution 1:200, Dako Omnis, Code Number: GA503), CD20  
120 (Monoclonal Mouse Anti-Human, Citrate Buffer HIER, dilution 1:200 Clone KP1, Dako  
121 Omnis, Code Number: M0814) and CD68 (Monoclonal Mouse Anti-Human, EDTA Buffer  
122 HIER, IHC dilution 1:5000, IF dilution 1:500, Clone L26, Dako Omnis, Code Number: M0756)  
123 were employed to characterize lympho-monocytic infiltrations. Microglial Activation was

124 assessed using both CD68 (as above), HLA-DR Antibody (Monoclonal Rabbit Anti-Human,  
125 Citrate Buffer HIER, dilution 1:50 Clone: LN-3, Invitrogen, Thermo Fisher Scientific,  
126 Waltham, MA, USA), TMEM119 (Rabbit Anti-Human, Citrate Buffer HIER, dilution 1:250,  
127 Abcam, Code Number: ab185333), while microglial proliferation was assessed using anti-  
128 Ki-67 immunohistochemistry (Mouse Anti-Human, EDTA Buffer HIER, dilution 1:200, Spring  
129 Bioscience, Code number: M3060). Anti-GFAP immunohistochemistry (Polyclonal Rabbit  
130 Anti-Human, Proteinase K enzymatic antigen retrieval, dilution 1:1000, DAKO Omnis, Code  
131 Number: GA524) was employed to assess reactive astrogliosis. Anti-CD61  
132 immunohistochemistry (Monoclonal Mouse Anti-Human, Citrate Buffer HIER, dilution 1:75,  
133 Clone Y2/51, Dako Omnis, Code Number: M0753) was also employed to evaluate the  
134 presence of platelet-enriched microthrombi.  
135 Anti-SARS-CoV-2 nucleocapsid (Rabbit Anti-Human, Citrate Buffer HIER, dilution 1:7000,  
136 Sino Biologicals, 40143-R001) and -Spike Subunit 1 Antibody (Monoclonal Rabbit Anti-  
137 Human, Citrate Buffer HIER, dilution 1:100, Clone 007, Sino Biological, Code Number:  
138 40150-R007) immunostainings were employed to evaluate viral antigens within the tissue.  
139 The expression of ACE2 Receptor protein (Rabbit Anti-Human Polyclonal, Citrate Buffer  
140 HIER, dilution 1:2000, Abcam, Code Number: ab15348) and TMPRSS-2 protein (Rabbit  
141 Anti-Human Monoclonal, Citrate Buffer HIER, dilution 1:2500, Abcam, Code Number:  
142 ab242384) was assessed within the brainstem and cerebellum, and in all sections with  
143 positive findings for viral proteins.  
144 Anti-nucleocapsid and anti-spike antibodies were validated through SARS-CoV-2 infected  
145 Vero E6 cells and autopsy-derived lung tissue from SARS-CoV-2 infected patients as  
146 positive controls; non-infected cells and lung sections deriving from autopsy cases predating  
147 COVID-19 pandemic (2017) were used as negative controls (Supplementary Figure 1).  
148 Peroxidase reactions were repeated at least three times to ensure reaction consistency.

149 *Immunofluorescent staining and confocal microscopy.* Fluorescent immunohistochemistry  
150 was performed manually. Antigen retrieval was performed on de-paraffinized tissue sections  
151 using Dako EnVision PTLINK station according to manufacturer recommendations. Following  
152 antigen retrieval, autofluorescence was quenched with a 50 mM NH<sub>4</sub>Cl solution for 10  
153 minutes. Sections were treated with permeabilization and blocking solution (15% vol/vol  
154 Goat Serum, 2% wt/vol BSA, 0.25% wt/vol gelatin, 0.2% wt/vol glycine in PBS) containing  
155 0.5% Triton X-100 for 90 minutes before primary antibody incubation. The following  
156 antibodies were employed: CD68 (#M0756; 1:500); TMEM119 (#ab185333; 1:200); Ki-67  
157 (#M3060; 1:200);  $\beta$ -III Tubulin (#T8578; 1:300); Tyrosine Hydroxylase (#T2928; 1:6000);  
158 SARS-CoV-2 Nucleocapsid Protein (#40143-R001; 1:3000); SARS-CoV-2 Spike Subunit 1  
159 Protein (#40150-R007; 1:100); ACE2 Receptor Protein (#ab15348; 1:500) and TMPRSS-2  
160 (#ab242384; 1:1000). Primary antibodies were diluted in blocking solution and incubated at  
161 4°C overnight. Alexa-Fluor plus 488 Goat anti-Mouse secondary antibody (Code number:  
162 A32723) and Alexa-Fluor plus 568 anti-Rabbit secondary antibody (Code number: A-11011)  
163 were diluted 1:200 in blocking solution as above and incubated for 60 minutes at room  
164 temperature. To further avoid background signal and tissue autofluorescence, slides were  
165 incubated for 10 minutes in 0.5% Sudan Black B solution in 70% ethanol at room  
166 temperature and abundantly washed with PBS, followed by Hoechst 33258 nuclear staining  
167 (Invitrogen, dilution: 1:10000 in PBS) for 10 minutes. Slides were mounted and coverslipped  
168 with Mowiol solution (prepared with Mowiol 4-88 reagent, MerckMillipore, Code number:  
169 475904-100GM). Confocal immunofluorescence z-stack images were acquired on a Leica  
170 SP5 Laser Scanning Confocal Microscope using a HC PL FLUOTAR 20x/0.50 Dry or HCX  
171 PL APO lambda blue 40X/1.40 Oil objectives. Images were acquired at a 16-bit intensity  
172 resolution over 2048 × 2048 pixels. Z-stacks images were converted into digital maximum  
173 intensity z-projections, processed, and analyzed using ImageJ software.



174 *RT-PCR analyses.* Viral RNA analysis was performed on 20µm thick paraffin-embedded  
175 sections collected in sterile 2ml Eppendorf vials; disposable microtome blades and tongs  
176 were changed for each section to reduce contamination risk. Real-time RT-PCR analyses  
177 were performed to detect SARS-CoV-2 genome sequences. Briefly, total RNA was purified  
178 from selected material using a RecoverAll™ Total Nucleic Acid Isolation kit (Thermo Fisher  
179 Scientific) following the manufacturer's instructions. One-step real-time RT-PCR assays  
180 targeting SARS-CoV-2 nucleocapsid (N) coding region and subgenomic RNA were run on  
181 ABI 7900HT Sequence Detection Systems (Thermo Fisher Scientific), as previously  
182 reported<sup>25</sup>.

183 *Histopathological and morphometrical evaluation.* Slides were examined by three  
184 independent histopathologists and morphologists blind to patient clinical findings and  
185 COVID-19 status. Disagreements were resolved by consensus. The degree of brainstem  
186 hypoxic / ischaemic damage, astrogliosis and microgliosis were classified using a four-tiered  
187 semi-quantitative approach for each evaluated section, while microglial density and  
188 activation was assessed by the means of digitally-assisted immunoreactivity quantification  
189 by three independent evaluators.

190 *Quantification of Activated Microglia.* The degree of microgliosis was assessed through a  
191 digitally-assisted quantification approach at the level of the medulla, pons and  
192 mesencephalon. For each subject, standard sections passing through the area postrema  
193 (medulla), locus coeruleus (pons) and decussation of the superior cerebellar peduncles or  
194 red nucleus (midbrain) underwent TMEM119 immunoperoxidase staining and TMEM119 /  
195 CD68 double fluorescent immunohistochemistry. TMEM119+ structures with visible nucleus  
196 and microglial-compatible morphology were classified as microglial cells, while TMEM119-  
197 / CD68+ elements with compatible morphology were classified as monocyte/macrophages.  
198 Ramifications and cell processes without a visible nucleus were excluded from our analysis



199 in order to avoid overestimation of cell densities by including neighboring structures  
200 belonging to adjacent sections. Morphometrical evaluation occurred within six counting  
201 fields (fields of view, FOV) spanning across the dorsal-to-ventral axis of the sections; FOV  
202 boundaries and anatomical landmarks are summarized in Supplementary Table 1 for each  
203 level of sectioning. The number of immunoreactivities per mm<sup>2</sup> was calculated for each  
204 counting field and assigned to one anatomical compartment (i.e. tegmentum, tectum and  
205 basis), based on their topography according to Mai and Paxinos<sup>26</sup>. Comparisons and  
206 statistical evaluations were conducted per individual counting field, anatomical compartment  
207 and level of section (medulla, pons, midbrain). To assess the degree of lysosomal-activity  
208 as a marker for microglia phagocytic activity, CD68 immunoreactive area (expressed as  
209 percentage of CD68+ immunoreactive area within a counting field, or A%) for 5 randomly  
210 selected counting fields at each level of sectioning was computed through particle analysis  
211 of the green fluorescent channel on ImageJ software.

212 *Statistical Analyses.* Statistical analyses and visualizations were performed using GraphPad  
213 Prism 9. Differences in microglial densities (microglia / mm<sup>2</sup>) within subgroups of the COVID-  
214 19 cohort in figures 4A, 5A and 6A were analyzed by t tests with Welch's correction.  
215 Microglial density between individual counting fields (FOVs) in COVID-19 subjects (Figures  
216 4D, 5D, and 6D), as well as differences between anatomical compartments in COVID-19  
217 subgroups (Figures 4B and 5B) and in COVID-19 versus controls (Figures 2E, 4C, 5B, 6E)  
218 were determined by Welch one-way ANOVA tests corrected for Dunnett's multiple  
219 comparisons. Correlation matrices in Figures 4E and 7G were computed as Spearman's rho  
220 for continuous variables and as point-biserial correlations for nominal – continuous  
221 variables. Spearman's rho and linear regression was performed in figure 2F. Further  
222 statistical details for each plot can be found in the corresponding figure legend. Throughout  
223 the manuscript \* indicates  $p < 0.05$ , \*\*  $p < 0.01$ , \*\*\*  $p < 0.001$  and \*\*\*\*  $p < 0.0001$ .

224 **Results**

225 *The main cause of death in COVID-19 subjects was diffuse alveolar damage.* Twenty-four  
226 COVID-19 patients were included in our study. In all patients, SARS-CoV-2 RNA was  
227 detected by molecular testing in rhino-pharyngeal swabs. Eleven were females, while 13  
228 were males. The mean age of the included subjects was  $73\pm 13.7$  years. Most included  
229 subjects were affected by preexisting chronic medical conditions. Eleven patients (7 female,  
230 4 male) were affected by neurological or neurodegenerative disease prior to SARS-CoV-2  
231 infection. Twenty-three patients were hospitalized prior to death. Patients were hospitalized  
232 for  $14.5\pm 11.3$  days and died 1 to 34 days following admission. Eleven subjects were  
233 admitted to the ICU during hospitalization and received intensive oxygen therapy (IOT) (i.e.  
234 the administration of supplemental oxygen via nasal cannulae, face masks, or tracheal  
235 intubation). Fifteen subjects received antithrombotic therapy during hospitalization and were  
236 treated with corticosteroid medication. The available clinical data for our cohort is reported  
237 in Table 1.

238 *The main cause of death of the control cohort was respiratory failure and pneumonia, aside*  
239 *from other relevant comorbidities.* Eighteen age- and sex-matched subjects with comparable  
240 ante-mortem medical conditions were included as controls. All patients were negative for  
241 SARS-CoV-2 infection or died prior to the COVID-19 pandemic in Italy. Eight were female,  
242 while 10 were male. The mean age of included controls was  $72\pm 12$  years. The mean  
243 hospitalization time was  $20\pm 15.6$  days. Thirteen patients died due to pneumonia, while the  
244 remaining subjects died due to respiratory insufficiency, multiorgan failure or ischaemic  
245 heart disease. One patient died due to septic shock. Five patients had a clinical diagnosis  
246 of cognitive decline. The available clinical data for the control group are reported in Table 2.

247

## 248 **Neuropathological examination**

249 *A wide spectrum of neuropathological alterations was detected in both COVID-19 and*  
250 *control subjects.* The brains of 20 COVID-19 subjects displayed gross macroscopic  
251 abnormalities including mild-to-moderate generalized cerebral atrophy (N=9), diffuse  
252 cerebral edema (N=9) and chronic territorial ischaemic injury (N=6). Histopathological  
253 evaluation revealed diffuse hypoxic / ischaemic damage as a common finding in the COVID-  
254 19 cohort, with most subjects presenting mild-to-moderate diffuse hypoxic / ischaemic  
255 damage of the cerebral hemispheres and brainstem (Figure 1C), quantified according a four-  
256 tiered semi-quantitative scale (reported in Table 1). Furthermore, acute ischaemic injuries  
257 were evident in 5 patients. Small vessels were congested in most subjects with moderate  
258 perivascular extravasation at the level of the medulla, pons and deep cerebellar nuclei in 6  
259 cases. Variable degrees of astrogliosis were evident in all subjects in all assessed regions,  
260 but were more pronounced at the level of the brainstem, as testified by GFAP staining  
261 (Supplementary Figure 3; semi-quantitative evaluation of astrogliosis across brain regions  
262 is available in Supplementary Table 2). Alzheimer Disease (AD) neuropathological changes,  
263 evaluated according to NIA-AA criteria, as well as Cerebral Amyloid Angiopathy (CAA) were  
264 detected in 5 subjects. In one case, Parkinson's Disease neuropathological alterations (i.e.  
265 deterioration of the ventrolateral substantia nigra and nigral lewy bodies) were found.

266 Control subjects presented similar macroscopic and histopathological alterations: mild-to-  
267 moderate generalized cerebral atrophy (N=7), mild-to-moderate diffuse cerebral edema  
268 (N=11) and chronic territorial ischemic injury (N=7); most subjects who died due to  
269 pneumonia or respiratory failure presented variable degrees of diffuse hypoxic / ischaemic  
270 damage, with mild to moderate damage of the brainstem being a common finding, similarly  
271 to COVID-19 subjects (Figure 1C); individual findings for hypoxic / ischaemic injury are  
272 reported in Table 2. Four subjects presented AD neuropathological changes and CAA, with

273 one subject presenting both AD and Lewy Body Dementia mixed pathology. The  
274 macroscopic and histopathological findings of both COVID-19 subjects and controls are  
275 reported in Table 1 and Table 2.

276

277 *CNS platelet-enriched microthrombi in small parenchymal vessels were detected in COVID-*  
278 *19 subjects, but not in controls.* Small vessel thromboses were detected in 9 COVID-19  
279 patients at the level of the pons, deep cerebellar nuclei and cerebral cortex, with one patient  
280 presenting small vessel thromboses in multiple sites. No CNS or systemic thromboses were  
281 detected in controls. In all COVID-19 cases, CD61 immunoperoxidase staining revealed  
282 platelet-rich microthrombi in small parenchymal vessels, with no evidence of arachnoid or  
283 meningeal vessels being involved, as seen in Figure 1D. Other organs were often affected,  
284 such as the lungs, liver, intestine, and hypopharynx and even the carotid body<sup>10,27-28</sup>, as  
285 summarized in Table 1. In 3 out of 9 cases, microthromboses were identified only within the  
286 CNS, while in the remaining 6 subjects, pulmonary thromboses were also detected.  
287 Interestingly, 3 out of 9 subjects with CNS microthrombi were on antithrombotic medication,  
288 4 were not actively treated prior to death, and in 2 cases clinical information regarding  
289 antithrombotic medication was incomplete. In line with previous findings in literature, CNS  
290 microthromboses appear to be peculiar to the COVID-19 cohort, with no control subject  
291 presenting either fibrin- or platelet-enriched microthrombi in the CNS or other organs  
292 regardless of the cause of death.

293

294 *Microglial cells with an activated phenotype and frequent microglial nodules were found in*  
295 *COVID-19 subjects, but not in controls.* In 23 COVID-19 subjects parenchymal microglia  
296 displayed an activated phenotype with characteristic thorny ramifications or amoeboid

297 morphology (Figure 2A-B). Interestingly, homeostatic microglial marker TMEM119 was  
298 consistently expressed in our cohort (Figure 2A-D), even though it is known to be  
299 downregulated upon microglial activation in various neuropathological conditions<sup>36</sup>. A similar  
300 pattern of immunoreactivity is also seen in Matschke et al.<sup>8</sup> and Schwabenland et al.<sup>18</sup>.  
301 Considering the relatively short hospitalization time prior to death of our COVID-19 cohort  
302 (14.5 days), and the similar immunoreactivity pattern compared to other available studies, it  
303 could be inferred that TMEM119 downregulation does not occur early in COVID-19.  
304 While in both COVID-19 subjects and controls microglial marker TMEM119 and lysosomal-  
305 activity marker CD68 were found within the same cell (2A-D), COVID-19 subjects displayed  
306 a more widespread CD68+ immunoreactivity (2A-B), with statistically significant differences  
307 in CD68 immunoreactive area (A%) at the level of the medulla and midbrain, but not the  
308 pons, between the two groups (Figure 2E, Welch ANOVA  $W= 42.68$ ; medulla  $p<0.0001$ ;  
309 pons  $p=0.733$ ; midbrain  $p<0.0001$ ). Ki-67 immunoperoxidase staining, as well as Ki-67 /  
310 CD68 double label immunofluorescent staining did not reveal significant Ki-67  
311 immunoreactivity ascribable to microglial cells, suggesting local microglial activation and  
312 migration without active proliferation in the considered cases. Microglial nodules associated  
313 with perineuronal HLA-DR+ / TMEM119+ / CD68+ cells were suggestive of neuronophagia  
314 in 18 COVID-19 subjects (Figure 3A-B, 4G, 6F) and were identified at the level of the  
315 substantia nigra (N=14), dorsal motor nucleus of the vagus (N=12), medullary reticular  
316 formation (N=9), area postrema (N=6) and basal ganglia (N=5); no microglial nodules were  
317 found in control cases, regardless of cause of death. Moreover, moderate to severe  
318 infiltration of CD68+/TMEM119- cells was found in 23 subjects (2A); given their prominent  
319 perivascular localization, these were likely monocyte-derived macrophages.

320

321 *In COVID-19 subjects, a topographically defined pattern of microgliosis was found in the*  
322 *medulla oblongata and midbrain. At the level of the medulla oblongata, Welch one-way*

323 ANOVA of individual counting fields (FOVs) (Figure 4C, F) revealed statistically significant  
324 differences ( $p < 0.001$ ) in TMEM119+/CD68+ activated microglial cells between the  
325 medullary tegmentum (T, FOV-13;  $216,84 \pm 52,26$  microglia /  $\text{mm}^2$ ) and the ventral medulla  
326 (pes, P, FOV4-6;  $156,09 \pm 35,16$  microglia /  $\text{mm}^2$ ) (Figure 4E-F); no differences were found  
327 between individual counting fields of the same anatomical compartment. Furthermore, no  
328 significant differences were found when comparing microglial density between IOT and non-  
329 IOT COVID-19 patients, as well as AD and non-AD patients with SARS-CoV-2 infection  
330 (Figure 4A). When comparing microglial density between COVID-19 patients and the control  
331 cohort, statistically significant differences were found when considering overall medullary  
332 microgliosis, as well as single anatomical compartments (Figure 4C).

333 At the level of the pons, Welch one-way ANOVA of individual counting fields revealed  
334 statistically significant differences only between the most dorsally located counting field  
335 comprising the locus coeruleus (FOV1), and other counting fields (FOV2-6) (Figure 5D, C).  
336 However, as for the medulla, no differences were found between IOT and non-IOT patients,  
337 as well as for AD versus non-AD patients (Figure 5A). Differences in overall microgliosis, as  
338 well as differences between anatomical compartments, were not significant between  
339 COVID-19 subjects and controls (Figure 5B). Hence, while there appears to be a higher  
340 degree of microgliosis in proximity to the locus coeruleus in COVID-19 when compared to  
341 other regions of the pons, no differences were found within COVID-19 subgroups and when  
342 compared to controls, indicating pontine microgliosis as a non-specific alteration in our  
343 cohort (Figure 5E-F).

344 At the level of the midbrain, COVID-19 subjects presented marked topographical differences  
345 between counting fields comprising the substantia nigra (midbrain tegmentum, FOV1-2 and  
346 FOV3, Figure 6C) when compared to counting fields of the midbrain tectum and pes (FOV4-  
347 6), as seen in Figure 6C-D. This anatomically segregated pattern of inflammation targeting  
348 mainly the substantia nigra, but also part of the pre-aqueductal tegmentum, indicates an

349 increasing dorsal-to-ventral gradient of microgliosis which affects the gray matter of the  
350 midbrain, sparing counting fields falling within the cerebral peduncle (FOV5-6). Similar to  
351 other brainstem levels, no statistically significant differences in overall microgliosis were  
352 found when comparing IOT and non-IOT subjects, as well as AD and non-AD subjects  
353 (Figure 6A). When compared to controls, COVID-19 subjects presented significantly higher  
354 microglial densities when considering both overall microgliosis, as well as microglial  
355 densities within anatomical compartments (Figure 6E), suggesting for a COVID-19-specific  
356 microglial response at the level of the midbrain (Figure 6F-G).

357 We also found a strong correlation between microglial densities across the different levels  
358 of the brainstem, as well as CD68+ A% of the corresponding level, as summarized in Figure  
359 2G. The strong positive correlation between microglial density and CD68 immunoreactive  
360 area further underlines the activated phenotype displayed by microglial cells in COVID-19.  
361 Interestingly, in the COVID-19 cohort, hospitalization time was positively correlated to  
362 microglial density in the medulla ( $r= 0.44$ ;  $p=0.044$ ), but not with microglial density in the  
363 pons and midbrain (Figure 2F). This appears to indicate an increase of microglial densities  
364 in the medulla as infection progresses, while the levels of microgliosis within the rest of the  
365 brainstem appear to remain relatively stable throughout time. Considering the numerous  
366 instances of microglial nodules and neuronophagia encountered in the medulla of the  
367 COVID-19 cohort, this is suggestive of prominent medullary impairment ongoing during  
368 COVID-19, regardless of oxygenation status or prior neurodegenerative pathology.  
369 Conversely, microglial density in the medulla also correlates with hypoxic / ischaemic  
370 damage of the brainstem, evaluated along a four-tiered semi-quantitative scale ( $r= 0.59$ ;  
371  $p=0.004$ ), as also seen in Thakur et al.<sup>37</sup>. Hence, while microgliosis is strongly characteristic  
372 of COVID-19 subjects and differs from controls, brainstem hypoxia / ischaemia plays a major  
373 role in mediating medullary microgliosis, as seen in our cohort and in accordance to previous  
374 literature.



375

376 *SARS-CoV-2 Viral proteins were detected in neurons of the medulla and midbrain in a*  
377 *subset of COVID-19 subjects, but not in controls.* Immunoperoxidase and  
378 immunofluorescent staining for SARS-CoV-2 spike protein and nucleocapsid protein was  
379 performed on all samples of included subjects, showing only positive results in cases with  
380 SARS-CoV-2 infection, but not in controls, indicating specificity. In particular, viral proteins  
381 were detected in seven subjects (#3, #7, #9, #10, #11, #17, #18) within CNS parenchyma  
382 and in five subjects (#3, #7, #9, #10, #17) with immunoreactive neurons within the  
383 anatomically defined boundaries of the solitary tract nucleus, dorsal motor nucleus of the  
384 vagus, nucleus ambiguus and substantia nigra (Figure 7A-D). As seen in double  
385 immunofluorescence labeling, SARS-CoV-2 Nucleocapsid protein antibody can be detected  
386 in  $\beta$ -III Tubulin (a pan-neuronal marker) immunoreactive structures, such as neuronal  
387 somata and neurites in the medulla and midbrain (Figure 7E-H), with no labeling in controls  
388 (Figure 7I). At the level of the midbrain, Nucleocapsid protein immunofluorescence was also  
389 found within tyrosine hydroxylase immunoreactive neurons and neurites of the substantia  
390 nigra, indicating the presence of viral antigens within dopaminergic neurons (Figure 8A-E).  
391 Some of these subjects (#7, #9, #11, #17, #18) also displayed endothelial cell  
392 immunoreactivity in small vessels of the cerebral cortex (subject #11), deep cerebellar nuclei  
393 (#17-18) hippocampus (#7) (Supplementary Figure 2) and midbrain (#9) (Figure 7H); small  
394 vessel thromboses, perivascular extravasation and hemorrhagic injury were found within  
395 affected regions of these cases.

396 In case #7, ischaemic injury of the right rostral hippocampal formation due to posterior  
397 cerebral artery (PCA) occlusion was associated with perivascular extravasation, edema,  
398 fibrinogen leakage and viral protein immunoreactivity within small vessel endothelium,  
399 further confirmed by RT-PCR. Acute hemorrhagic injury in the territory of the right middle  
400 cerebral artery (MCA) in #11 (Figure 1B) was associated with endothelitis within perilesional

401 tissue, displaying both viral protein immunoreactive endothelium and positive RT-PCR.  
402 Similarly, the deep cerebellar white matter and dentate nuclei in cases #17-18 presented  
403 small vessel thromboses and extensive hemorrhagic injury (case #17). Conversely, in some  
404 cases with small vessel thromboses within the pons and frontal cortex (e.g. #19-20), viral  
405 proteins and RNA was not detectable. There was no correlation between viral protein  
406 immunoreactivity / RT-PCR Cycle threshold and hospitalization time (Figure 4E), suggesting  
407 no apparent link between the detection of viral antigens and genomic sequences and post-  
408 infection interval. However, the actual length of infection, particularly prior to hospitalization,  
409 could not always be safely determined, as pre-symptomatic infection could not be excluded,  
410 nor evaluated, from the available clinical data. ACE2 receptor protein and TMPRSS2 protein  
411 immunoreactivity was compatible with the anatomical distribution of SARS-CoV-2 antigens  
412 (Supplementary Figure 1, E-F), as detected with immunoperoxidase staining, but was not  
413 consistently replicated in immunofluorescent staining (data not shown). Both proteins were  
414 moderately expressed in vascular endothelial cells and brainstem neurons.

415

416 *RT-PCR analyses of FFPE tissue sections detected viral RNA in COVID-19 cases with viral*  
417 *protein immunoreactivity.* Molecular testing by real-time RT-PCR detected SARS-CoV-2  
418 RNA in 10 out of 24 COVID-19 subjects, 9 of whom had also SARS-CoV-2 S and/or N  
419 protein-positive IHC / IF (Figure 7L-M, Supplementary Table 2). In positive tissue samples,  
420 threshold cycles (Ct) of real-time RT-PCR for SARS-CoV-2 RNA ranged between 33 and  
421 38, while in all samples the Ct values of the internal control RNaseP ranged between 27  
422 and 34. The cycle threshold values for each analyzed section are reported in Supplementary  
423 table 2 and in Figure 7L-M for the medulla and midbrain. SARS-CoV-2 subgenomic RNA  
424 was investigated but not detected in our specimens, likely due to RNA degradation within  
425 FFPE sections, as indicated by the low Ct values of RNase P.

426 *Viral antigens are associated to higher microglial densities within affected anatomical loci,*  
427 *but no differences are found in overall microgliosis, suggesting a specific topographical*  
428 *response.* While overall levels of microgliosis within the medulla, pons and midbrain did not  
429 differ significantly between COVID-19 subjects with and without detectable viral antigens,  
430 Welch one-way ANOVA between anatomical compartments (i.e. tegmentum, tectum and  
431 pes) revealed statistically significant differences within the COVID-19 cohort. Indeed,  
432 subjects with detectable viral genomic sequences and antigens (RT-PCR+/IHC+) were  
433 characterized by higher microglial densities in the medullary ( $p=0.017$ ) and midbrain  
434 tegmentum ( $p=0.0074$ ) when compared to negative (RT-PCR-/IHC-) COVID-19 subjects, as  
435 seen in Figure 4B and 6B. In association with frequent instances of microglial nodules and  
436 perineuronal TMEM119+/CD68+ microglial cells suggestive of neuronophagia (Figure 3A-  
437 B), this finding suggests a peculiar microglial response towards anatomical loci of the  
438 brainstem in which SARS-CoV-2 antigens were detected, even though overall levels of  
439 microgliosis within brainstem regions did not appear to differ significantly. Taken together  
440 with little-to-no Ki-67 immunoreactivity and no detectable Ki-67+ / CD68+  
441 immunofluorescent signal, migration of microglial cells towards the site of injury appears to  
442 be the more likely mechanism occurring in COVID-19 inflammation, rather than microglial  
443 proliferation within affected regions.

444

## 445 **Discussion**

446 In the present study, the neuropathological findings of 24 COVID-19 patients were examined  
447 and compared with age- and sex-matched controls who died due to pneumonia and / or  
448 respiratory insufficiency. Our findings indicate, in line with some of the previous autopsy  
449 reports, specific neuropathological alterations in the brains of COVID-19 patients, with  
450 particular regard to topographically-defined microgliosis within anatomical loci of the

451 brainstem and viral immunoreactivity in specific CNS compartments, either within the  
452 boundaries of brainstem nuclei or in the context of ischaemic and hemorrhagic injuries.  
453 Platelet and fibrin microthrombi, in particular, were characteristic findings of the COVID-19  
454 cohort, and often affected multiple organs, such as the lungs, liver, intestine, hypopharynx  
455 and even the carotid body<sup>10,27-28</sup>, as summarized in Table 1. Microthromboses were more  
456 frequent within the pons, deep cerebellar nuclei and cerebral cortex. In some cases,  
457 hemorrhagic injury and microthromboses were found in regions with viral protein  
458 immunoreactivity in vascular endothelial cells.

459 SARS-CoV-2 viral antigens, on the other hand, were confined to specific loci of the CNS. As  
460 seen in Figure 7A-H, SARS-CoV-2 appears to be localized preferentially within neurons of  
461 the vagal nuclei of the medulla and the substantia nigra, with the exception of one subject  
462 who also presented immunoreactive cells throughout the whole brainstem (#3). While  
463 Matschke et al.<sup>8</sup> reported SARS-CoV-2 invasion of cranial nerves IX-X, we were unable to  
464 replicate these findings within our cohort; furthermore, unlike Meinhardt et al.'s findings<sup>9</sup>,  
465 viral proteins and RNA were not detectable in any of the sampled olfactory bulbs, tracts and  
466 bifurcations, even though moderate edema, moderate-to-severe astrogliosis and moderate  
467 microglial activation was encountered in most cases in our study. ACE2 Receptor and  
468 TMPRSS-2 protein immunohistochemistry support this topographical localization, with  
469 neurons within the dorsal motor nucleus of the vagus, solitary tract nucleus, nucleus  
470 Ambiguus and Substantia Nigra being moderately immunoreactive (Supplementary Figure  
471 1, E-F).

472 While previous studies identified viral protein immunoreactivity in sparse cells throughout  
473 the brainstem<sup>8-18</sup> without specific topography, our findings appear to be in line with available  
474 animal studies on other coronaviruses, i.e. SARS-CoV and MERS-CoV, which are known to  
475 be able to infect the brainstem, and particularly the dorsal motor nucleus of the vagus,  
476 solitary tract nucleus and nucleus ambiguus, so that an analog pattern of neuroinvasion for

477 SARS-CoV-2 has been suggested<sup>17,29-31</sup>. The peculiar and unexpected finding in our cohort  
478 was the detection of viral antigens and genomic sequences within the substantia nigra, not  
479 matching any known models of coronavirus neurotropism. Interestingly, SARS-CoV-2 S and  
480 N protein were detected in both tyrosine hydroxylase positive and negative neurons (Figure  
481 8). Immunoreactive neurons of the substantia nigra were frequently found in proximity to  
482 blood vessels, which were at times immunoreactive to viral proteins as well (Figure 7H,  
483 Supplementary Figure 2). Hence, aside from olfactory-transmucosal transmission identified  
484 by Meinhardt et al.<sup>9</sup>, and vagus/glossopharyngeal-mediated invasion identified by Matshe  
485 et al.<sup>8</sup>, SARS-CoV-2 may gain access to other districts of the CNS either through a yet-  
486 unknown neuronal route or, as suggested by our findings in the midbrain and as seen in  
487 Schwabland et al.'s study<sup>18</sup>, by crossing the blood-brain-barrier and infecting structures of  
488 the peri- and juxtavascular compartment. We believe these findings encourage further  
489 research on the possibility that these events may be the trigger of a neurodegenerative  
490 process such as Parkinson disease in susceptible individuals. Future studies on COVID-19  
491 survivors and Long COVID patients are therefore warranted<sup>39</sup>.

492 However, despite the detection of viral proteins and genomic sequences in restricted regions  
493 of the brainstem, we found no evident neuropathological alterations in SARS-CoV-2 infected  
494 cells, such as necrotic changes and other cytological alterations, that could hint towards  
495 possible direct consequences of viral invasion in human neurons. COVID-19 is  
496 characterized by different evolutionary phases and heterogeneous individual responses,  
497 and the short interval between infection and death in our cohort (mean hospitalization time  
498 = 14 days), as well as the fact that included patients died during the acute phase of the  
499 disease, may not be sufficient to determine detectable neuropathological alterations in  
500 affected cells as a direct consequence of viral invasion, which may require more time to  
501 develop<sup>3,31</sup>. Lastly, the detection of viral proteins in a subset of patients (5 out of 24), as

502 seen in this and previous studies may be related to the particularly severe disease, and  
503 concurring comorbidities, of the patients subject to neuropathological examination.

504 Hence, while the consequences of SARS-CoV-2 neurotropism in the medulla have been  
505 widely discussed in literature, and are supported by the detection of viral proteins and  
506 genomic sequences in our study, the absence of direct neuronal damage and the  
507 impossibility of performing functional assays on post-mortem samples should be taken into  
508 consideration when discussing the clinical implications of COVID-19 neuropathology. Future  
509 studies on “long COVID” patients<sup>3</sup> may be able to shed a light on the long-term  
510 consequences of COVID-19, particularly concerning the detection of SARS-CoV-2 within  
511 the CNS after the acute phase of the disease, and whether or not this leads to specific  
512 neuropathological alterations as a consequence of viral invasion.

513

514 Concerning microglial activation and density, our findings appear to be in line with  
515 Schwabenland et al.<sup>18</sup>, who identified microglial nodules and parenchymal reactive microglia  
516 as hallmark for COVID-19, in contrast to both controls and ExtraCorporeal Membrane  
517 Oxygenation (ECMO) patients. In our cohort, patients with pneumonia and / or respiratory  
518 failure served as control group and, although also characterized by microglial activation,  
519 displayed lower microglial counts in the medulla and midbrain, but not in the pons, when  
520 compared to COVID-19 subjects. We also found no significant effect of oxygen therapy on  
521 microglial density within the COVID-19 group. Conversely, Deigendesh et al.<sup>33</sup> found  
522 significant differences in HLA-DR+ activated microglia when comparing COVID-19 subjects  
523 to non-septic controls, but no differences were found with patients who had died under septic  
524 conditions; according to the authors<sup>33</sup> this may represent a histopathological correlate of  
525 critical illness-related encephalopathy, rather than a COVID-19-specific finding. Aside from  
526 the distinct populations serving as control subjects, significant methodological differences  
527 between these studies must be taken into consideration. Our approach to microglial

528 quantification was more similar to Schwabenland et al.<sup>18</sup>, as digitally-assisted manual  
529 counting of TMEM119+ cells, a homeostatic microglia-specific marker, was performed to  
530 estimate microgliosis; however, we also expanded on these findings by estimating  
531 microgliosis in a topographically dependent manner by employing set counting fields within  
532 anatomically defined regions; conversely Deigendesh et al.<sup>33</sup> quantified HLA-DR  
533 immunoreactive area, a marker expressed on both microglia and on infiltrating lympho-  
534 monocytic cells, as a fraction of the counting field (A%), and not as individual particles.  
535 Hence, while our estimation selectively reflects the activity of microglial cells in COVID-19  
536 and pneumonia controls within anatomically defined regions of the brainstem, Deigendesh's  
537 study offers a broader representation of overall brainstem inflammation under different  
538 conditions, including patients deceased under septic conditions, explaining differences  
539 between our studies.

540 Interestingly, while no evidence of direct neuronal damage was found in SARS-CoV-2  
541 infected cells, microglial densities within affected anatomical loci differed between subjects  
542 with and without detectable viral antigens and genomic sequences (RT-PCR/IHC+ versus  
543 RT-PCR/IHC- in Figure 4B and 6B), suggesting a link between the detection of SARS-CoV-  
544 2 antigens and microglial response. Conversely, overall microglial density (i.e. without  
545 topographical delineation) did not differ between the two groups, and a strong correlation  
546 between microgliosis and hypoxic / ischaemic damage at the level of the brainstem was  
547 found. Hence, while we found a suggestive link between microgliosis and the detection of  
548 SARS-CoV-2 antigens in our cohort, other factors such as hypoxia / ischaemia and systemic  
549 inflammation / cytokine storm ongoing during COVID-19, as previously reported by Thakur  
550 et al<sup>37</sup>, are likely to play a more prominent role in determining brainstem microgliosis, in  
551 accordance to previous studies<sup>33</sup>.

552



## 553 **Conclusions**

554 The present study contributes to define the spectrum of neuropathological alterations in  
555 COVID-19, as well as the neuroinvasive potential of SARS-CoV-2 within the CNS. Unlike  
556 previous findings, we have documented a subset of COVID-19 cases in which viral proteins  
557 and genomic sequences were detectable within anatomically defined regions of the CNS.  
558 Similarly, microglial activation in the brainstem appears to differ between COVID-19 and  
559 pneumonia / respiratory failure controls, with the former also presenting a pattern of  
560 increased microglial density in specific compartments of the medulla and midbrain.  
561 However, despite this evidence supporting the neuroinvasive potential of SARS-CoV-2,  
562 neuropathological alterations encountered in our cohort cannot be ascribed to viral antigens  
563 detected in the brainstem. In line with other studies in literature, hypoxic / ischaemic damage  
564 and systemic inflammation likely represent major contributors in determining  
565 neuropathological alterations in COVID-19, with little-to-no evidence indicating direct viral  
566 damage of the central nervous system in humans. Moreover, further investigation is required  
567 to determine whether or not SARS-CoV-2 neurotropism represents a major component of  
568 COVID-19 in the general population, as subjects included in neuropathological studies often  
569 present a much more severe course of the disease and major medical comorbidities.  
570 Nevertheless, the findings of our study suggest the possibility that, although not frequently,  
571 SARS-CoV-2 may gain access to specific regions of the central nervous system, especially  
572 the vagal nuclei of the medulla and the substantia nigra in the midbrain. As direct  
573 neuropathological alterations determined by SARS-CoV-2 neurotropism may not be  
574 detectable in subjects deceased during the acute phase of the disease, future studies are  
575 required to determine whether or not SARS-CoV-2 neurotropism is present in chronic  
576 COVID-19 patients, or in COVID-19 survivors suffering from the long-term effects of  
577 infection, and if eventual neuropathological alterations in these subjects can be ascribed to  
578 viral tropism, rather than immune-mediated mechanisms.

## 579 **Limitations of the study**

580 This study is based on post-mortem tissue samples obtained during the first wave of the  
581 COVID-19 pandemic in Italy. While the neuropathological alterations encountered in our  
582 work contribute to define the pathological mechanisms of COVID-19 and SARS-CoV-2  
583 infection in the CNS, the lack of exhaustive post-infection neurological evaluation of included  
584 patients does not allow for unequivocal clinico-pathological correlations. It must also be  
585 considered that most patients included in the study died during the peak of the sanitary  
586 emergency in Italy, one of the first countries to face the COVID-19 pandemic in Europe, and  
587 neurological evaluation was not always possible. Hence, it remains to be determined  
588 whether the neuropathological alterations observed in this study are also linked to  
589 neurological symptoms, and whether they are also present in COVID-19 survivors.

590 Unlike previous studies in literature, we have included 18 controls who died due to  
591 pneumonia, respiratory insufficiency or multiorgan failure, rather than healthy controls.  
592 Retrospective selection of control subjects, however, could lead to unwanted selection bias.  
593 Furthermore, from the available clinical data of our controls, we have found no instances of  
594 intensive oxygen therapy or mechanical ventilation, but incompleteness of available clinical  
595 records cannot entirely be excluded. For this purpose, we have also performed comparisons  
596 within the COVID-19 group, identifying no statistically significant differences between  
597 subjects with and without neurodegenerative conditions, and no influence of oxygen therapy  
598 on brainstem microgliosis. The involvement of other brain regions, such the cerebral and  
599 cerebellar cortex and the basal ganglia, cannot be excluded but is beyond the scopes of this  
600 study. Moreover, as all patients died during the first wave of the COVID-19 pandemic, our  
601 findings may not reflect the possible neuropathological alterations encountered in patients  
602 affected by SARS-CoV-2 variants.

603 Limitations to viral antigen / RNA detection in our study must also be considered. Real-time  
604 RT-PCR cannot exclude detection of viral RNA in blood vessels within samples. While  
605 particular care was taken to avoid contamination by employing sterile instruments and  
606 disposable microtome blades when sampling FFPE sections for RT-PCR analyses, the main  
607 strength of our study was the complementary use of immunoperoxidase and  
608 immunofluorescent staining with different antibodies to detect viral antigen as an indicator  
609 of viral tropism. This is further strengthened by the strong concordance between these  
610 assays in our cohort, quantified by a statistically significant positive correlation between RT-  
611 PCR cycle threshold and IHC positivity ( $r=0.87$ ,  $p<0.0001$ ).

612 In conclusion, further investigation is required to determine the direct effects of viral invasion  
613 within the CNS, with particular regard to cases of long-lasting infection and in COVID-19  
614 survivors.

615

## 616 **Acknowledgements**

617 We are grateful to Prof. James E. Goldman for his feedback and suggestions concerning  
618 our study.

619

620 **Data Sharing:** data is available from the corresponding author upon request; raw data  
621 underlying graphs and statistical analyses has been provided to the editor, reviewers, and  
622 is available upon reasonable request.

623 **Conflicts of interest:** the authors declare no conflicts of interest.

624 **Ethical approval:** All procedures were carried out in accordance to the Declaration of  
625 Helsinki. Samples were anonymous to the investigators and used in accordance with the

626 directives of the Committee of the Ministers of EU member states on the use of samples of  
627 human origin for research.

628 **Figure Legends**

629 **Figure 1. A)** Study Workflow. Brain sections of multiple sites were sampled from 24 COVID-  
630 19 patients and 18 age- and sex-matched controls who died due to pneumonia and / or  
631 respiratory failure. **B)** Left, coronal brain section of Subject #11 revealing extensive  
632 hemorrhagic injury in the territory of the middle cerebral artery. Right, sampling procedure  
633 of the brainstem through axial sections passing perpendicularly to the floor of the fourth  
634 ventricle. **C)** Haematoxylin and eosin photomicrographs of the Dorsal Motor Nucleus of the  
635 Vagus in the medulla oblongata displaying various degrees of hypoxic / ischaemic damage  
636 in COVID-19 subjects (upper row) and controls (lower row) **D)** Platelet microthrombi at the  
637 level of the pons and cerebral cortex, CD61 immunohistochemistry.

638 **Figure 2.** Double label TMEM119 (microglia marker, red) / CD68 (lysosomal activity marker,  
639 green) fluorescent immunohistochemistry in COVID-19 and control subjects. **A-B)** in  
640 COVID-19, microglial cells present a distinctly activated phenotype whilst maintaining  
641 homeostatic microglial marker TMEM119 (Red) and displaying increased lysosomal activity  
642 (CD68, green). Arrows indicate CD68+ / TMEM119- monocyte/macrophage in the  
643 parenchyma. **C-D)** In control subjects, TMEM119 marks both the soma and sparse  
644 ramifications of resident microglia, suggesting less prominent activation without significant  
645 marker downregulation. CD68 immunoreactivity (green) is also present, but not as  
646 distributed as in COVID-19. **E)** Welch one-way ANOVA of CD68+ A% in COVID-19 and  
647 controls reveals statistically significant differences between the two groups at the level of  
648 the medulla ( $p < 0.0001$ ) and midbrain ( $p < 0.0001$ ), but not the pons. **F)** Spearman correlation  
649 between microglial densities across brainstem levels and hospitalization time reveals a  
650 statistically significant positive correlation between medullary microgliosis and  
651 hospitalization time ( $r = 0.44$ ;  $p = 0.044$ ). **G)** Correlation matrix between microglial densities  
652 and CD68+ A% across brainstem levels.

653 **Figure 3. A)** Low-magnification perspective of the medulla oblongata in COVID-19,  
654 displaying a ventral-to-dorsal increasing gradient of microglial densities (TMEM119, red;  
655 Beta-III Tubulin, green) **B-C)** Double label TMEM119 (microglial marker, red) and Beta-III  
656 Tubulin (neuronal marker, green) immunofluorescent staining at the level of the medulla  
657 oblongata. Insets display neuronophagia at the level of the dorsal motor nucleus of the  
658 vagus in two COVID-19 subjects.

659 **Figure 4. A)** Welch corrected T-test plot of microglial densities (microglia / mm<sup>2</sup>) in the  
660 medulla oblongata of COVID-19 subjects treated ( $n = 10$ , red) and not treated ( $n = 11$ , black)  
661 with intensive oxygen therapy ( $p > 0.05$ ), and of COVID-19 subjects with ( $n = 5$ , red) and  
662 without ( $n = 16$ , black) Alzheimer's Disease neuropathological changes ( $p > 0.05$ ). **B)** Welch  
663 one-way ANOVA between anatomical compartments (T, tegmentum; P, pes) between  
664 COVID-19 subjects with ( $n = 5$ , red) and without ( $n = 16$ ) viral tropism (RT-PCR/IHC+ versus  
665 RT-PCR/IHC-) reveals statistically significant differences at the level of the medullary  
666 tegmentum ( $p = 0.017$ ). **C)** Welch one-way ANOVA between anatomical compartments (T,  
667 tegmentum; P, pes) between COVID-19 subjects ( $n = 21$ , red) and controls ( $n = 18$ , black)  
668 reveals statistically significant differences both at the level of the medullary tegmentum  
669 ( $p < 0.0001$ ) and pes ( $p = 0.017$ ). **D)** Welch one-way ANOVA of microglial densities per

670 counting fields (FOV) reveals statistically significant differences between FOVs of the  
671 Tegmentum (T; FOV1-3) when compared to FOVs of the Pes (P; FOV4-6). **E**) Correlation  
672 heatmap between COVID-19 subject clinical data and neuropathological findings. **F**)  
673 Anatomical heatmap of activated microglia within the medulla oblongata in COVID-19. **G-H**)  
674 TMEM119 immunoperoxidase staining of comparable regions of the medulla oblongata in  
675 COVID-19 subjects (above) and controls (below). Inset: neuronophagia in the dorsal motor  
676 nucleus of the vagus. Arrow: microglial nodule.

677 **Figure 5. A)** Welch corrected T-test plot of microglial densities (microglia / mm<sup>2</sup>) in the pons  
678 of COVID-19 subjects with (n=5, red) and without (n=16, black) Alzheimer's Disease  
679 neuropathological changes ( $p>0.05$ ), and of COVID-19 subjects treated (n=10, red) and not  
680 treated (n=13, black) with intensive oxygen therapy ( $p>0.05$ ). **B)** Welch one-way ANOVA  
681 between anatomical compartments (T, tegmentum; P, pes) between COVID-19 subjects  
682 (n=23, red) and controls (n=18, black) reveals no statistically significant differences either at  
683 the level of the medullary tegmentum ( $p=0.55$ ) and pes ( $p=0.98$ ). **C)** Anatomical heatmap of  
684 activated microglia within the pons in COVID-19. **D)** Welch one-way ANOVA of microglial  
685 densities per counting fields (FOV) reveals statistically significant differences between FOV1  
686 (dorsal pons, including locus coeruleus) with other pontine counting fields. **E-F)** TMEM119  
687 immunoperoxidase staining of comparable regions of the pons in COVID-19 subjects  
688 (above) and controls (below).

689 **Figure 6. A)** Welch corrected T-test plot of microglial densities (microglia / mm<sup>2</sup>) in the  
690 midbrain of COVID-19 subjects with (n=5, red) and without (n=16, black) Alzheimer's  
691 Disease neuropathological changes ( $p>0.05$ ), and of COVID-19 subjects treated (n=10, red)  
692 and not treated (n=11, black) with intensive oxygen therapy ( $p>0.05$ ). **B)** Welch one-way  
693 ANOVA between anatomical compartments (TG, tegmentum; TC, tectum; P, pes) between  
694 COVID-19 subjects with (n=5, red) and without (n=18) viral tropism (RT-PCR/IHC+ versus  
695 RT-PCR/IHC-) reveals statistically significant differences at the level of the midbrain  
696 tegmentum ( $p=0.0074$ ), but not other anatomical districts. **C)** Anatomical heatmap of  
697 activated microglia within the medulla oblongata in COVID-19. **D)** Welch one-way ANOVA  
698 of microglial densities per counting fields (FOV) reveals statistically significant differences  
699 between FOVs of the Tegmentum (T; FOV1-2) when compared to FOVs of the Pes (P;  
700 FOV5-6), suggesting for a localized pattern of microgliosis comprising the preaqueductal  
701 tegmentum and the substantia nigra. **E)** Welch one-way ANOVA between anatomical  
702 compartments (TG, tegmentum; TC, tectum; P, pes) between COVID-19 subjects (n=23,  
703 red) and controls (n=18, black) reveals statistically significant differences between all  
704 anatomical districts of the midbrain ( $p<0.0001$ ). **F-G)** TMEM119 immunoperoxidase staining  
705 of comparable regions of the midbrain in COVID-19 subjects (above) and controls (below).  
706 Inset: perineuronal microglia in the substantia nigra. COVID-19 subjects often present  
707 distinct microglial nodules.

708 **Figure 7.** Topographical localization of SARS-CoV-2 Viral Protein Immunoreactivities  
709 (Triangles, Right Half) and Microglial Nodules (Asterisks, Left Half) throughout the  
710 brainstem. **A)** At the level of the Mesencephalon, Immunoreactivities are found mainly within  
711 the boundaries of the substantia nigra, with the exception of Subject #3, which also  
712 presented immunoreactive neurons within the Interstitial Nucleus of Cajal; Microglial



713 nodules were confined mainly within the boundaries of the tegmentum, and were not  
714 detected neither within the pes nor the tectum. **A1)** SARS-CoV-2 Spike Protein IHC at the  
715 level of the Substantia Nigra reveals immunoreactive neurons (mean of 2 immunoreactivities  
716 per mm<sup>2</sup>) with well-marked processes (black arrows); negative neurons can also be found  
717 nearby (white arrows). **A2)** SARS-CoV-2 Nucleocapsid Protein IHC reveals a similar pattern  
718 of immunoreactive neurons and axons throughout the substantia nigra. **B)** At the level of the  
719 pons, Subject #3 presented immunoreactive neurons (mean of 5 immunoreactivities per  
720 mm<sup>2</sup>) within the basilar nuclei, while microglial nodules were found both within the basis,  
721 as well as the dorsal pons in proximity to the facial nucleus. **B1)** SARS-CoV-2 Spike Protein  
722 IHC at the level of the pons in Subject #3, displaying immunoreactive neurons (black arrows)  
723 within the basilar nuclei of the pons; non-reactive cells can also be appreciated (white  
724 arrows) **C)** At the level of the upper medulla oblongata, immunoreactivities were found at  
725 the level of the dorsal motor nucleus of the vagus, solitary tract nucleus and nucleus  
726 ambiguus; microglial nodules were prominent within the Vagal Trigone and Area Postrema,  
727 but were also found within the reticular formation and the inferior olivary complex. **C1-2)**  
728 SARS-CoV-2 Spike Protein IHC at the level of the solitary tract nucleus and nucleus  
729 ambiguus; immunoreactive neurons can be seen within the anatomical boundaries of these  
730 nuclei (black arrows), along with non-reactive cells (white arrows). Inset of a single reactive  
731 neuron within the solitary tract nucleus, Spike Protein immunohistochemistry. **D)** At the level  
732 of the Lower Medulla Oblongata, Immunoreactivities were found at the level of the spinal  
733 trigeminal nucleus and medullary reticular formation. Microglial nodules were found within  
734 the medullary reticular formation. **D1)** SARS-CoV-2 Spike Protein IHC at the level of the  
735 medullary reticular formation in the lower medulla (black arrows); non-reactive cells are  
736 indicated with a white arrow. **E-I)** Double label N and S Protein (red) and Beta-III Tubulin  
737 (green) fluorescent immunohistochemistry in COVID-19 subjects (E-H) and controls (I).  
738 Distinct immunoreactive neurons and neurites can be appreciated in both the medulla  
739 (dorsal motor nucleus of the vagus) and midbrain (substantia nigra) (E-G). Juxtavascular  
740 immunoreactive neurons in proximity to an immunoreactive vessel in the midbrain of COVID-  
741 19 subject #9 (H, inset). Control subjects present no viral protein immunoreactivity (I). **L-M)**  
742 N and S protein IHC, real time RT-PCR Cycle Thresholds for SARS-CoV-2 N Gene and  
743 RNaseP quality control in our COVID-19 cohort at the level of the medulla (L) and midbrain  
744 (M).

745

746 **Figure 8.** Double label N Protein (red) and Tyrosine Hydroxylase (green) fluorescent  
747 immunohistochemistry at the level of the substantia nigra in the midbrain. **A-C)** in COVID-  
748 19, Both TH+ and TH- neurons display N protein immunoreactivity. **D-E)** in COVID-19  
749 subjects with negative RT-PCR/IHC (D) as well as non-COVID controls (E) no N protein  
750 staining was detected.

751

752

753



754

755 **REFERENCES**

- 756 1. Ellul, M.A., Benjamin, L., Singh, B., et al. Neurological associations of COVID-19.  
757 *Lancet Neurol.* **19**, 767–783 (2020) doi:10.1016/s1474-4422(20)30221-0.
- 758 2. Helms, J., Kremer, S., Merdji, H., et al. Neurologic Features in Severe SARS-CoV-2  
759 Infection. *N. Engl. J. Med.* **382**, 2268–2270 (2020) doi:10.1056/nejmc2008597.
- 760 3. Huang, C., Huang, L., Wang, Y., et al. 6-month consequences of COVID-19 in  
761 patients discharged from hospital: a cohort study. *Lancet* **397**, 220-232 (2021)
- 762 4. Iadecola, C., Anrather, J., Kamel, H. Effects of COVID-19 on the Nervous System.  
763 *Cell* **183**, 16–27 (2020) doi:10.1016/j.cell.2020.08.028.
- 764 5. Mao, L., Jin, H., Wang, M., et al. Neurologic Manifestations of Hospitalized Patients  
765 with Coronavirus Disease 2019 in Wuhan, China. *JAMA Neurol.* **77**, 683 (2020)  
766 doi:10.1001/jamaneurol.2020.1127.
- 767 6. Puelles, V.G., Lütgehetmann, M., Lindenmeyer, M.T., et al. Multiorgan and Renal  
768 Tropism of SARS-CoV-2. *N. Engl. J. Med.* **383**, 590–592 (2020)  
769 doi:10.1056/nejmc2011400.
- 770 7. Jacob, F., Pather, S.R., Huang, W.K., Zhang, F., et al. Human Pluripotent Stem  
771 Cell-Derived Neural Cells and Brain Organoids Reveal SARS-CoV-2 Neurotropism  
772 Predominates in Choroid Plexus Epithelium. *Cell Stem Cell.* **27**, 937-950. (2020)  
773 doi: 10.1016/j.stem.2020.09.016.
- 774 8. Matschke, J., Lütgehetmann, M., Hagel, C., et al. Neuropathology of patients with  
775 COVID-19 in Germany: a post-mortem case series. *Lancet Neurol.* **19**, 919-929  
776 (2020) doi: 10.1016/S1474-4422(20)30308-2.
- 777 9. Meinhardt, J., Radke, J., Dittmayer, C., et al. Olfactory transmucosal SARS-CoV-2  
778 invasion as a port of central nervous system entry in individuals with COVID-19. *Nat*  
779 *Neurosci.* **24**, 168-175 (2021) doi: 10.1038/s41593-020-00758-5.
- 780 10. Porzionato, A., Emmi, A., Conran, M., et al. The Carotid Body in COVID-19:  
781 histopathological and virological analyses of an autopsy case series. *Front.*  
782 *Immun.* (2021) doi:10.3389/fimmu.2021.736529
- 783 11. Solomon, I.H., Normandin, E., Bhattacharyya, S., et al. Neuropathological Features  
784 of Covid-19. *N Engl J Med.* **383**, 989-992 (2020) doi: 10.1056/NEJMc2019373.
- 785 12. Trevisan, M., Riccetti, S., Sinigaglia, A., Barzon, L. SARS-CoV-2 Infection and  
786 Disease Modelling Using Stem Cell Technology and Organoids. *Int J Mol Sci.* **22**,  
787 2356 (2021)
- 788 13. Bauer, L., Lendemeijer, B., Leijten, L., et al. Replication Kinetics, Cell Tropism, and  
789 Associated Immune Responses in SARS-CoV-2- and H5N1 Virus-Infected Human  
790 Induced Pluripotent Stem Cell-Derived Neural Models. *mSphere* 6:e0027021,  
791 (2021) doi: 10.1128/mSphere.00270-21.
- 792 14. Pellegrini, L., Albecka, A., Mallery, D.L., Kellner, M.J., Paul, D., Carter, A.P., James,  
793 L.C., Lancaster, M.A. SARS-CoV-2 Infects the Brain Choroid Plexus and Disrupts  
794 the Blood-CSF Barrier in Human Brain Organoids. *Cell Stem Cell.* **27**, 951-961.e5.  
795 (2020) doi: 10.1016/j.stem.2020.10.001.
- 796 15. Song, E., Zhang, C., Israelow, B., Lu-Culligan, A., Prado, A.V., Skriabine, S., Lu, P.,  
797 et al. Neuroinvasion of SARS-CoV-2 in human and mouse brain. *J Exp Med.*  
798 **218**:e20202135. (2021) doi: 10.1084/jem.20202135.
- 799 16. Zheng, J., Wong, L.R., Li, K., et al. COVID-19 treatments and pathogenesis  
800 including anosmia in K18-hACE2 mice. *Nature* **589**, 603-607 (2021) doi:  
801 10.1038/s41586-020-2943-z.

- 802 17. Desforges, M., Le Coupanec, A., Stodola, J.K., Meessen-Pinard, M., Talbot, P.J.  
803 Human coronaviruses: viral and cellular factors involved in neuroinvasiveness and  
804 neuropathogenesis. *Virus Res.* **194**, 145-58 (2014) doi:  
805 10.1016/j.virusres.2014.09.011.
- 806 18. Schwabenland, M., Salié, H., Tanevski, J., et al. Deep spatial profiling of human  
807 COVID-19 brains reveals neuroinflammation with distinct microanatomical  
808 microglia-T-cell interactions. *Immunity* **54**, 1594-1610.e11. (2021) doi:  
809 10.1016/j.immuni.2021.06.002.
- 810 19. Lee, M.H., Perl, D.P., Nair, G., et al. Microvascular Injury in the Brains of Patients  
811 with Covid-19. *N Engl J Med.* **384**, 481-483. (2021) doi: 10.1056/NEJMc2033369.
- 812 20. Yang, A.C., Kern, F., Losada, P.M., et al. Dysregulation of brain and choroid plexus  
813 cell types in severe COVID-19. *Nature* **595**, 565-571 (2021) doi: 10.1038/s41586-  
814 021-03710-0.
- 815 21. Schurink, B., Roos, E., Radonic, T., et al. Viral presence and immunopathology in  
816 patients with lethal COVID-19: a prospective autopsy cohort. *Lancet Microbe* **1**,  
817 e290-e299 (2020)
- 818 22. Barton, L.M., Duval, E.J., Stroberg, E., Ghosh, S., Mukhopadhyay, S. COVID-19  
819 Autopsies, Oklahoma, USA. *Am J Clin Pathol* **153**, 725-733 (2020) doi:  
820 10.1093/ajcp/aqaa062.
- 821 23. Reichard, R.R., Kashani, K.B., Boire, N.A., Constantopoulos, E., Guo, Y.,  
822 Lucchinetti, C.F. Neuropathology of COVID-19: a spectrum of vascular and acute  
823 disseminated encephalomyelitis (ADEM)-like pathology. *Acta Neuropathol.* **140**, 1-6  
824 (2020) doi: 10.1007/s00401-020-02166-2.
- 825 24. Schaller, T., Hirschbühl, K., Burkhardt, K. Postmortem Examination of Patients With  
826 COVID-19. *JAMA* **323**, 2518-2520 (2020) doi: 10.1001/jama.2020.8907.
- 827 25. Lavezzo, E., Franchin, E., Ciavarella, C., Cuomo-Dannenburg, G., Barzon, L., et al.  
828 Suppression of a SARS-CoV-2 outbreak in the Italian municipality of Vo'. *Nature.*  
829 **584**, 425-429 (2020) doi: 10.1038/s41586-020-2488-1.
- 830 26. Mai, J. K., and Paxinos, G. *The Human Nervous System*, 3rd Edn. (Elsevier,  
831 Amsterdam, 2012)
- 832 27. Basso, C., Leone, O., Rizzo, S., et al. Pathological features of COVID-19-  
833 associated myocardial injury: a multicentre cardiovascular pathology study. *Eur*  
834 *Heart J.* **41**, 3827-3835 (2021) doi: 10.1093/eurheartj/ehaa664.
- 835 28. Porzionato, A., Stocco, E., Emmi, A., et al. Hypopharyngeal Ulcers in COVID-19:  
836 Histopathological and Virological Analyses - A Case Report. *Front Immunol.* **12**,  
837 e676828. (2021) doi: 10.3389/fimmu.2021.676828.
- 838 29. Li, Y.C., Bai, W.Z., Hashikawa, T. The neuroinvasive potential of SARS-CoV2 may  
839 play a role in the respiratory failure of COVID-19 patients. *J Med Virol.* **92**, 552-555.  
840 (2020) doi: 10.1002/jmv.25728.
- 841 30. Porzionato, A., Emmi, A., Barbon, S., Boscolo-Berto, R., Stecco, C., Stocco, E.,  
842 Macchi, V., De Caro, R. Sympathetic activation: a potential link between  
843 comorbidities and COVID-19. *FEBS J.* **287**, 3681-3688 (2020) doi:  
844 10.1111/febs.15481.
- 845 31. Porzionato, A., Emmi, A., Stocco, E., Barbon, S., Boscolo-Berto, R., Macchi, V., De  
846 Caro, R. The potential role of the carotid body in COVID-19. *Am J Physiol Lung Cell*  
847 *Mol Physiol.* **319**, 620-626. (2020) doi: 10.1152/ajplung.00309.2020.
- 848 32. Iturriaga, R., Castillo-Galán, S. Potential contribution of carotid body-induced  
849 sympathetic and renin-angiotensin system overflow to pulmonary hypertension in  
850 intermittent hypoxia. *Curr Hypertens Rep.* **21**, 89 (2019)

- 851 33. Deigendesch, N., Sironi, L., Kutza, M., et al. Correlates of critical illness-related  
852 encephalopathy predominate postmortem COVID-19 neuropathology. *Acta*  
853 *Neuropathol.* **140**, 583-586 (2020) doi: 10.1007/s00401-020-02213-y.
- 854 34. Emmi, A., Antonini, A., Macchi, V., Porzionato, A., De Caro, R. Anatomy and  
855 Connectivity of the Subthalamic Nucleus in Humans and Non-human Primates.  
856 *Front Neuroanat.* **14**, 13 (2020) doi: 10.3389/fnana.2020.00013.
- 857 35. Emmi, A., Porzionato, A., Contran, M., De Rose, E., Macchi, V., De Caro, R. 3D  
858 Reconstruction of the Morpho-Functional Topography of the Human Vagal Trigone.  
859 *Front Neuroanat.* **15**, 663399(2021) doi: 10.3389/fnana.2021.663399.
- 860 36. Schwabenland, M., Brück, W., Priller, J., Stadelmann, C., Lassmann, H., Prinz, M.  
861 Analyzing microglial phenotypes across neuropathologies: a practical guide. *Acta*  
862 *Neuropathol.* **142**, 923-936. (2021) doi: 10.1007/s00401-021-02370-8.
- 863 37. Thakur, K.T., Miller, E.H., Glendinning, M.D., et al. COVID-19 neuropathology at  
864 Columbia University Irving Medical Center/New York Presbyterian Hospital. *Brain.*  
865 **144**, 2696-2708 (2021) doi: 10.1093/brain/awab148.
- 866 38. Fullard, J.F., Lee, H.C., Voloudakis, G., et al. Single-nucleus transcriptome analysis  
867 of human brain immune response in patients with severe COVID-19. *Genome Med.*  
868 **13**, 118 (2021) 19. doi:10.1186/s13073-021-00933-8
- 869 39. Sulzer, D., Antonini, A., Leta, V., Nordvig, A., Smeyne, R. J., Goldman, J. E., et al.  
870 COVID-19 and possible links with Parkinson's disease and parkinsonism: from  
871 bench to bedside. *NPJ Parkinson's disease*, **6**, 18 (2020)  
872 <https://doi.org/10.1038/s41531-020-00123-0>



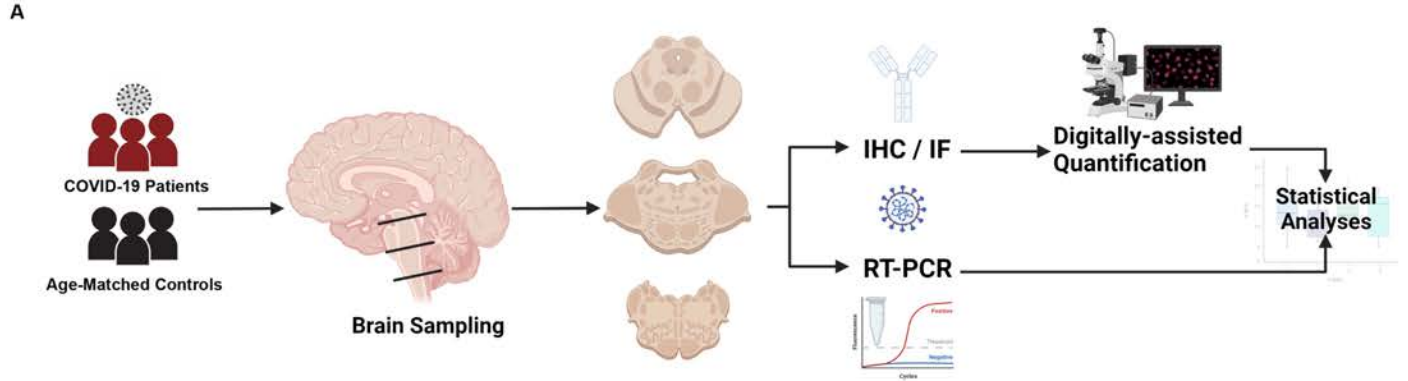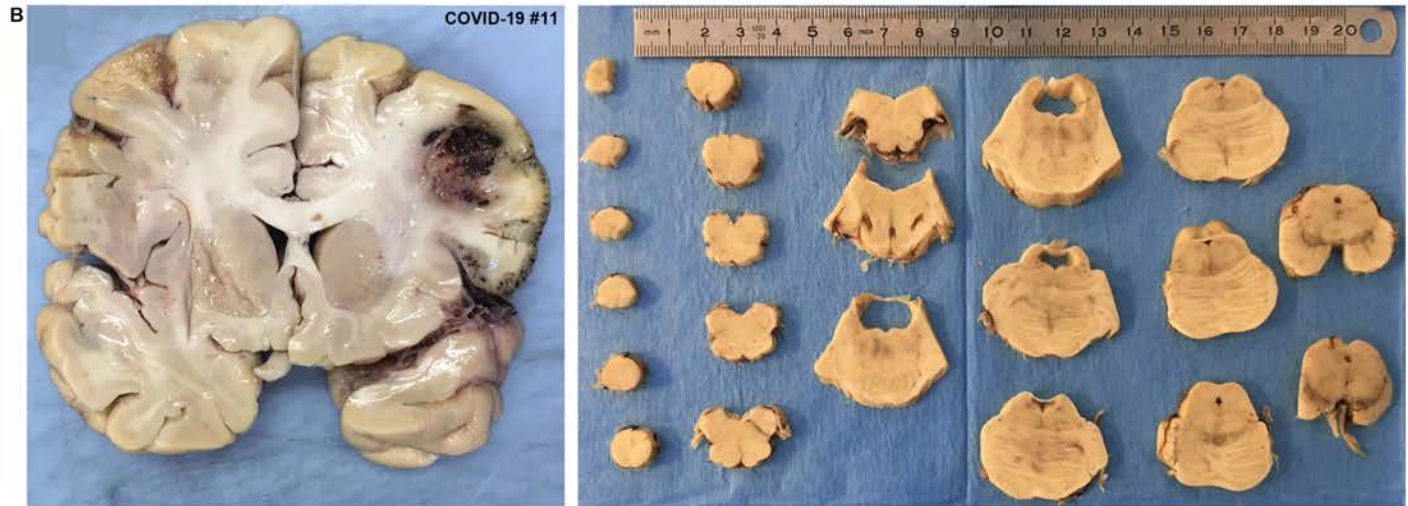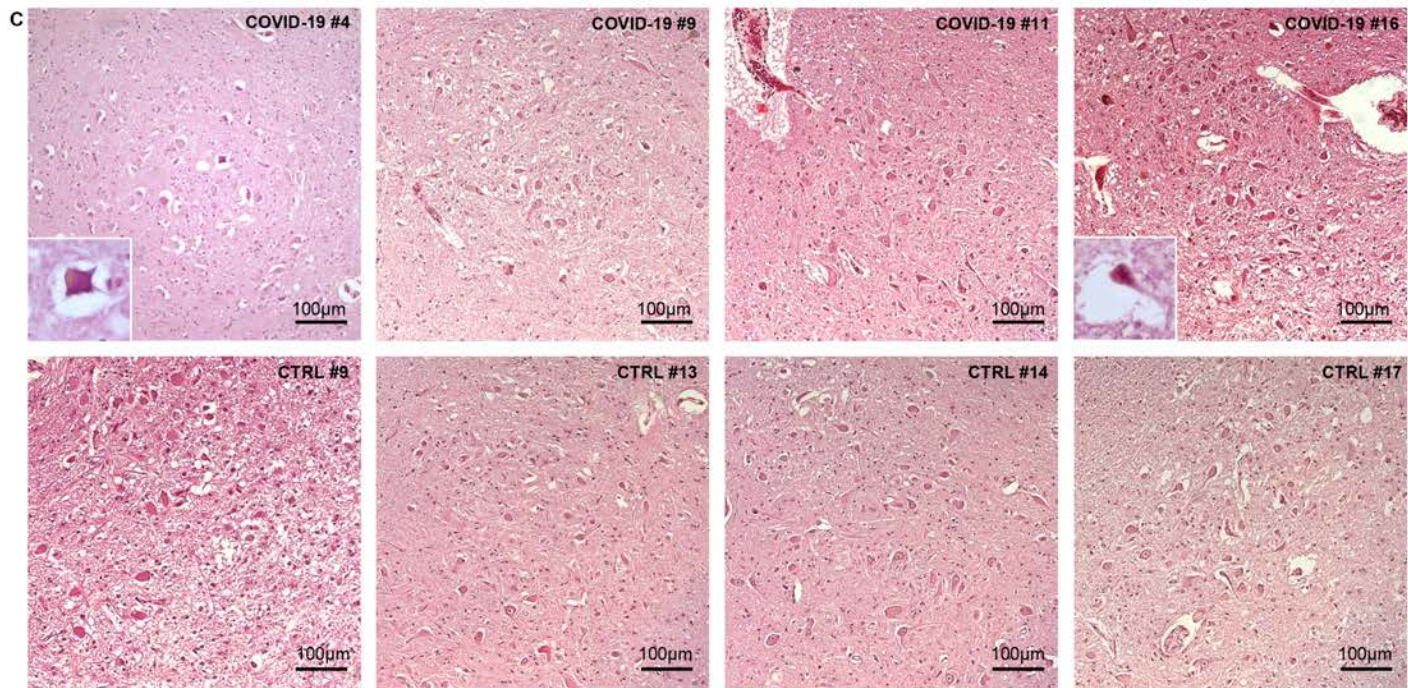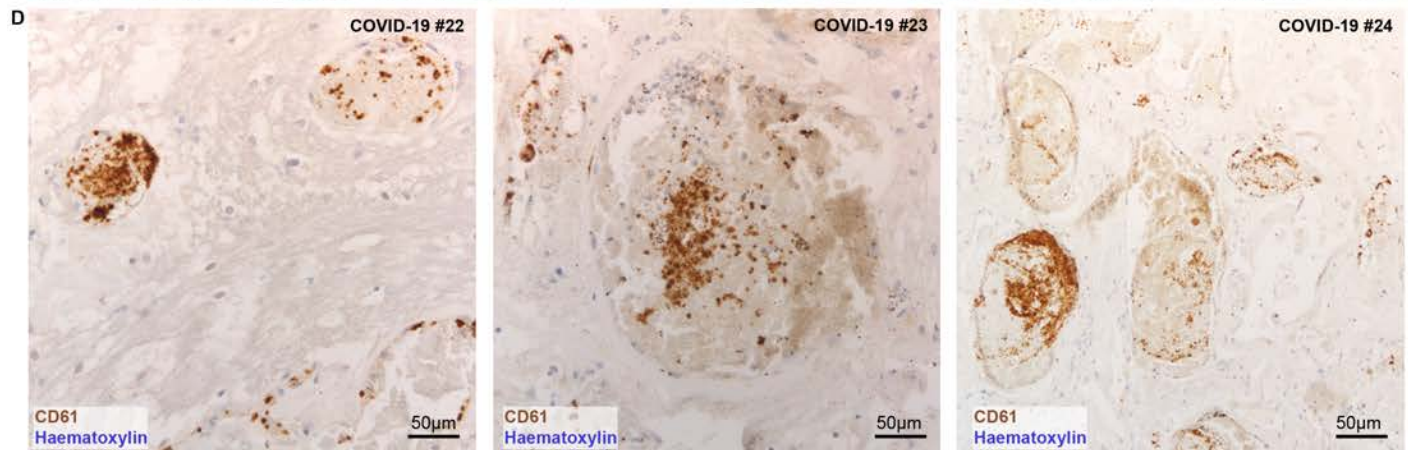



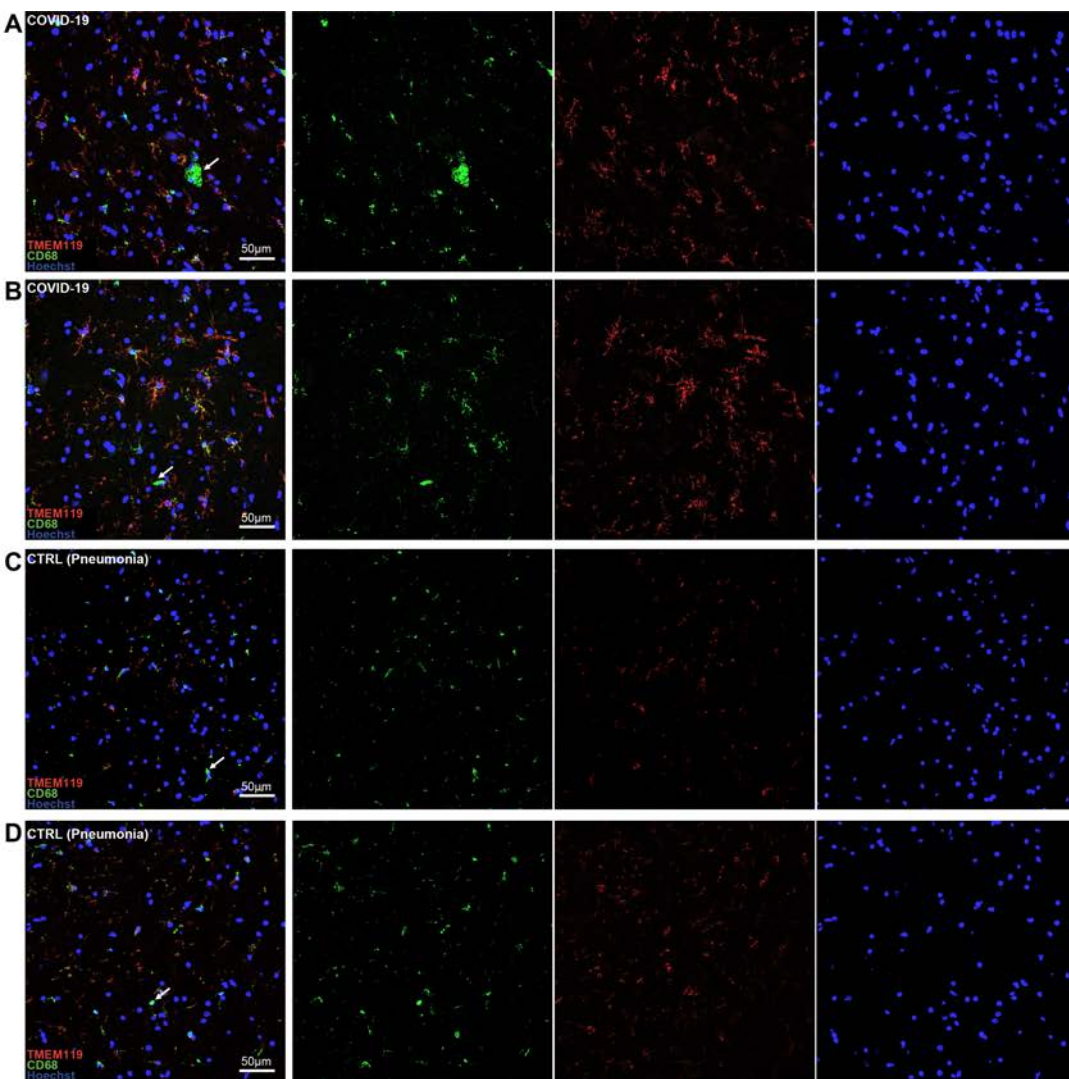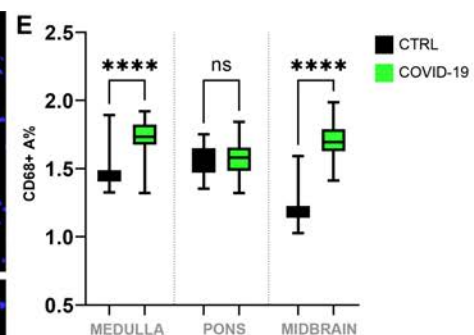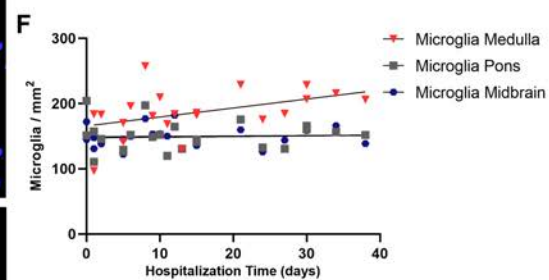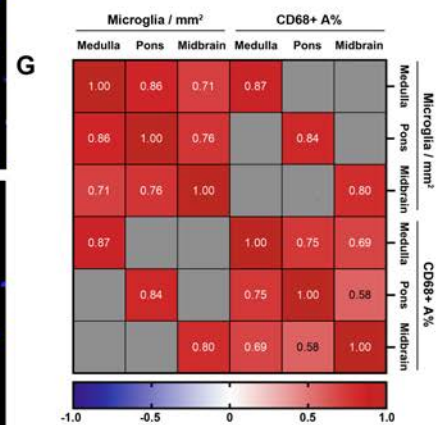

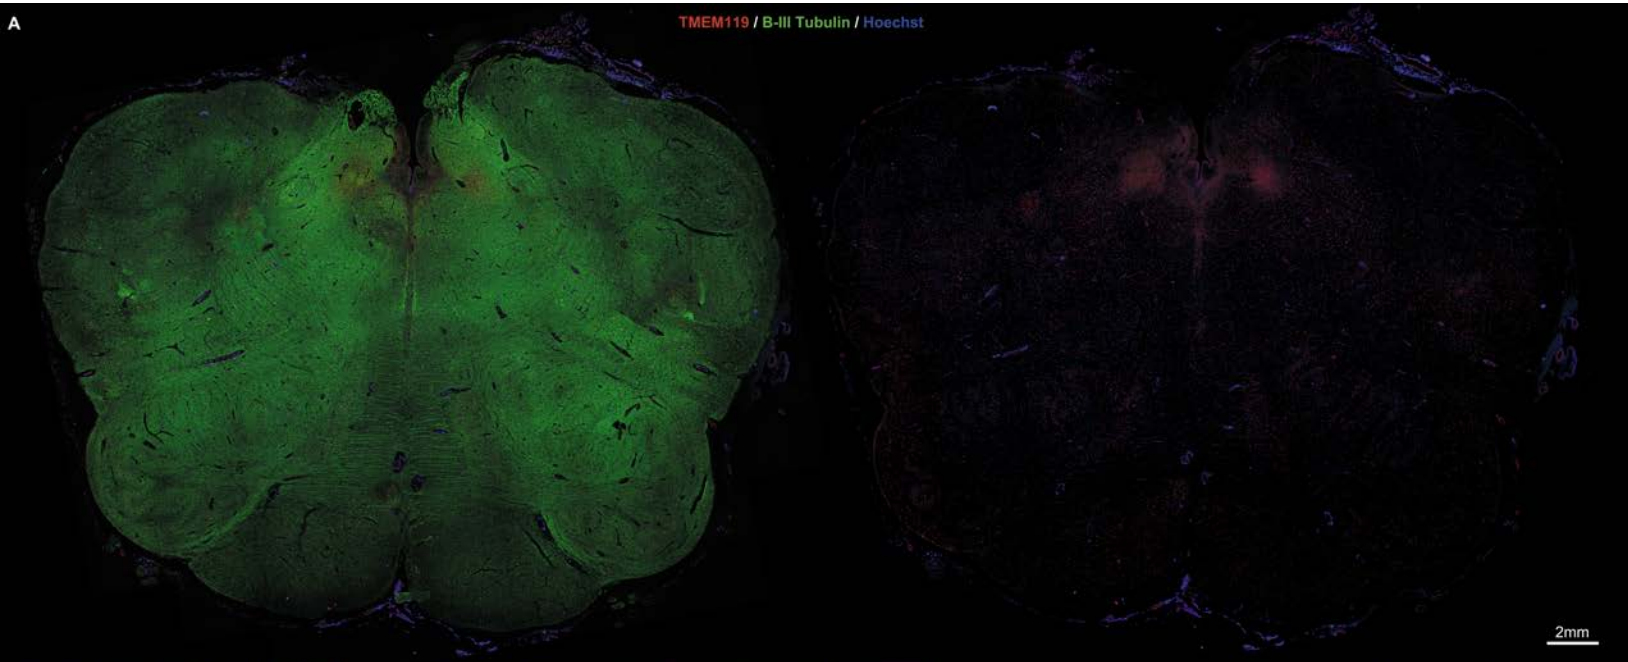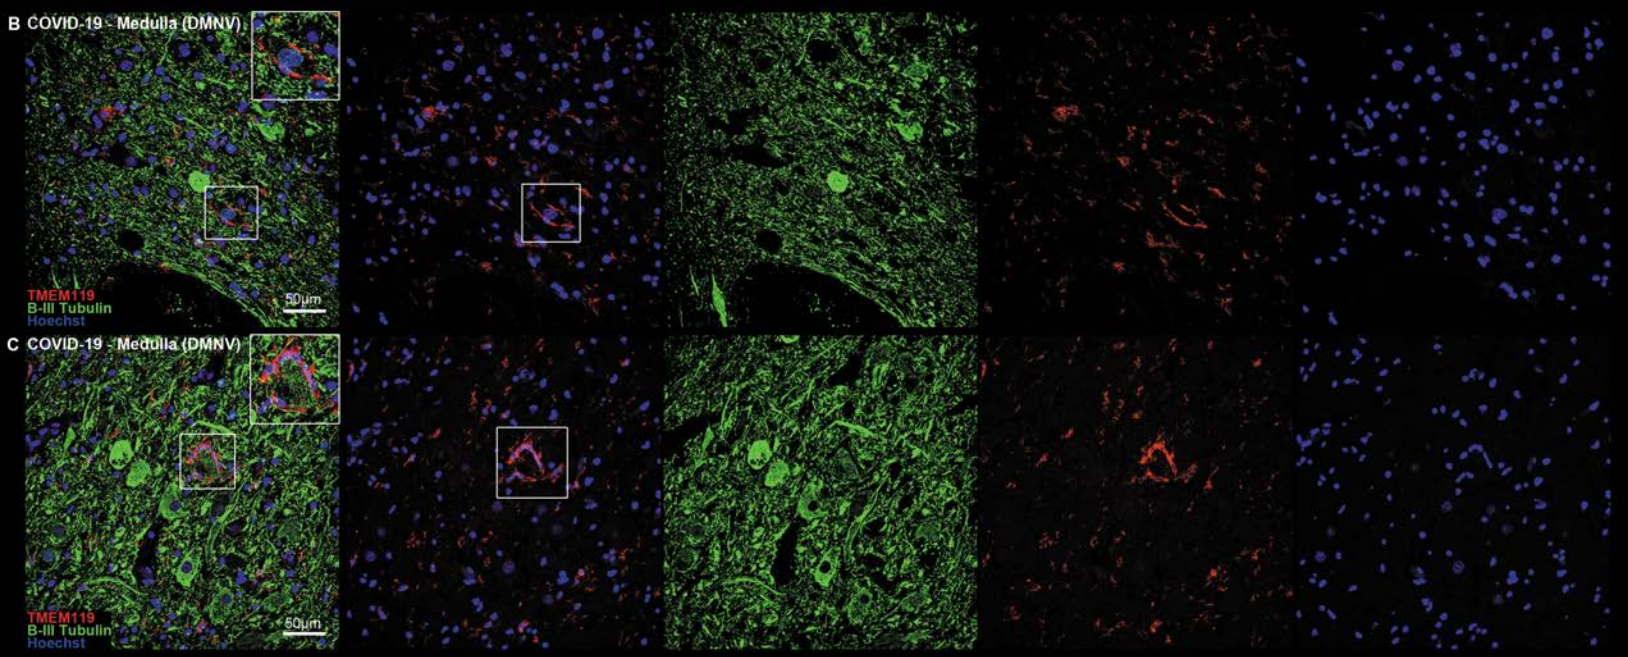







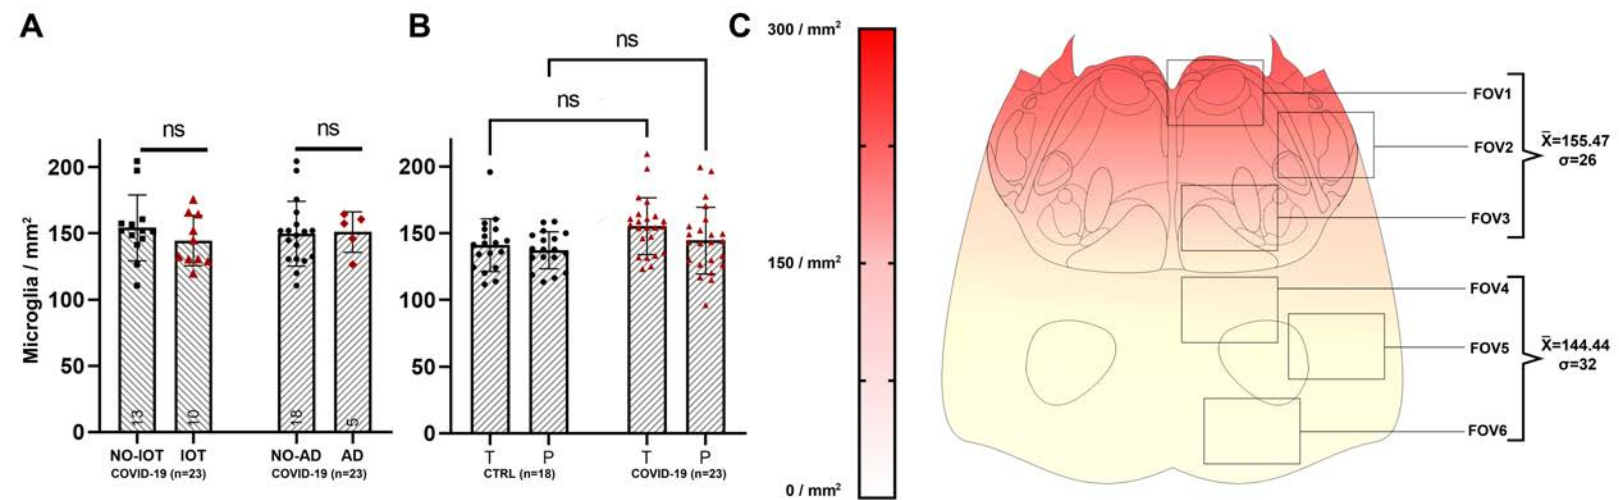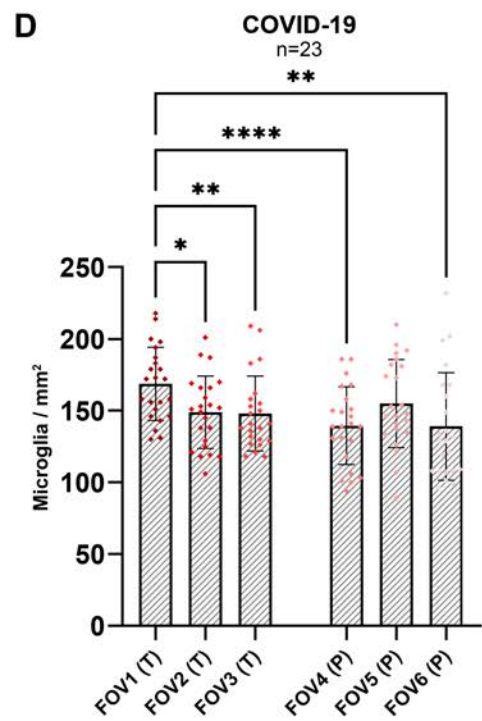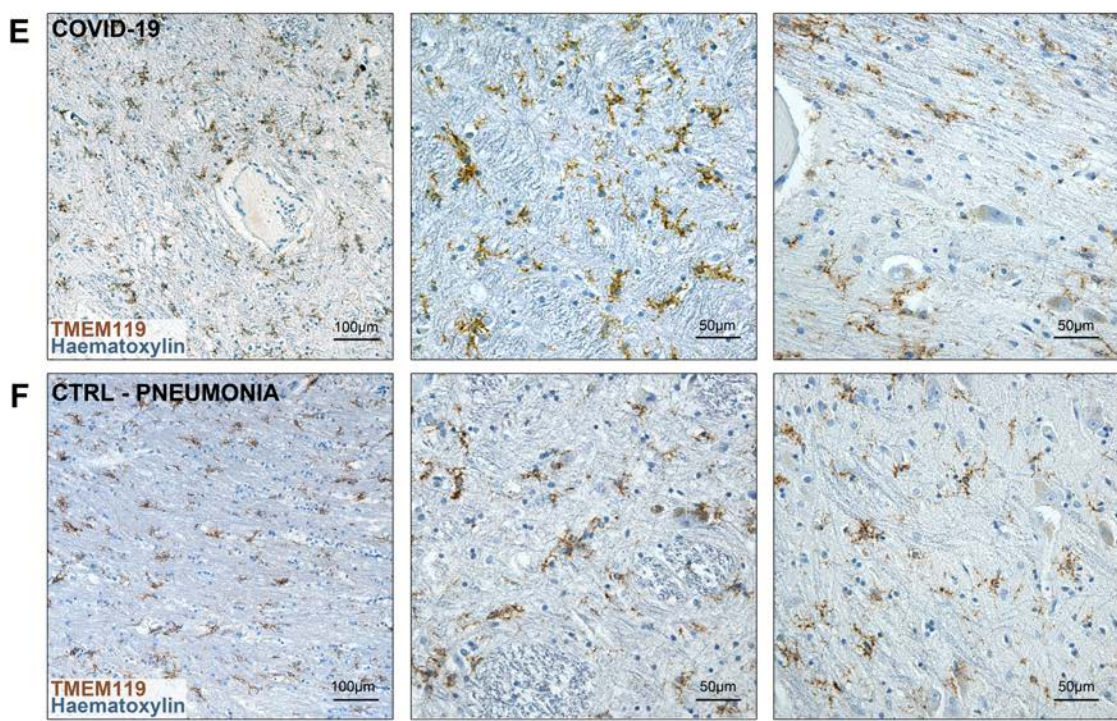

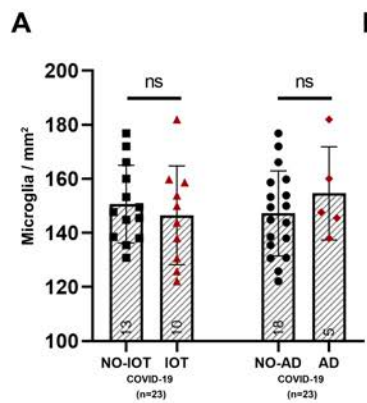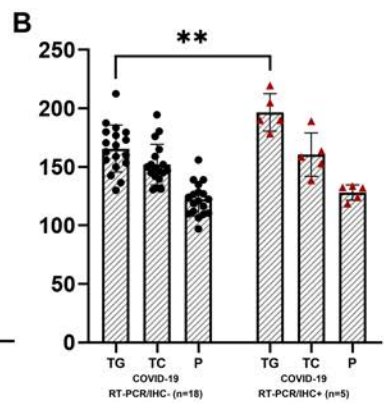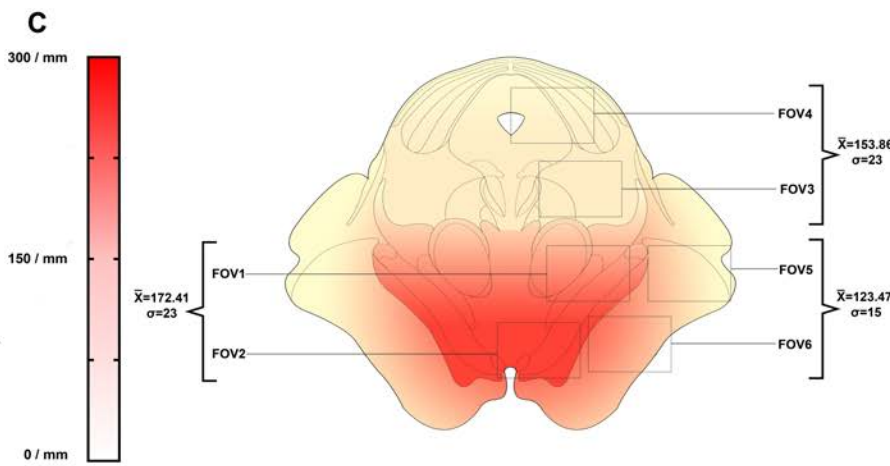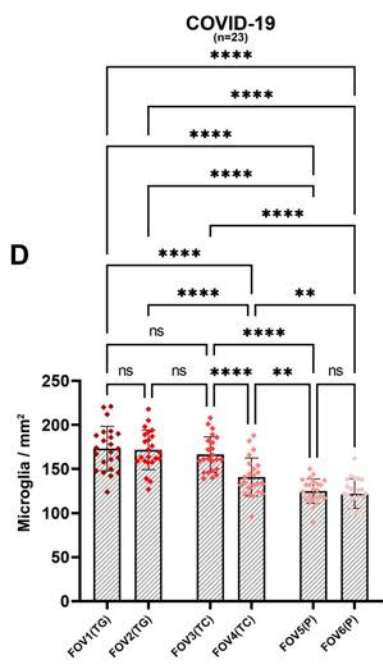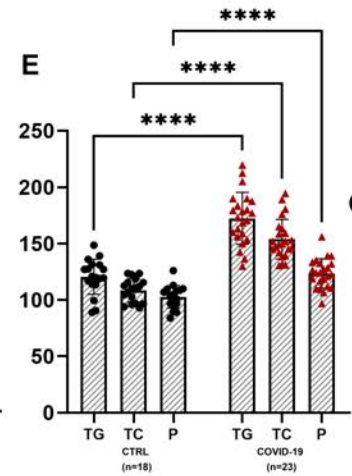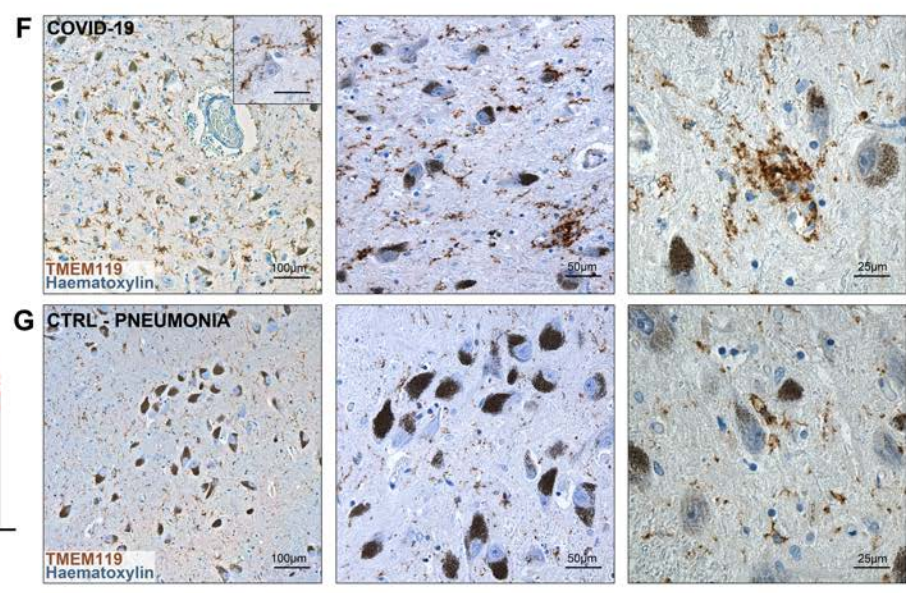







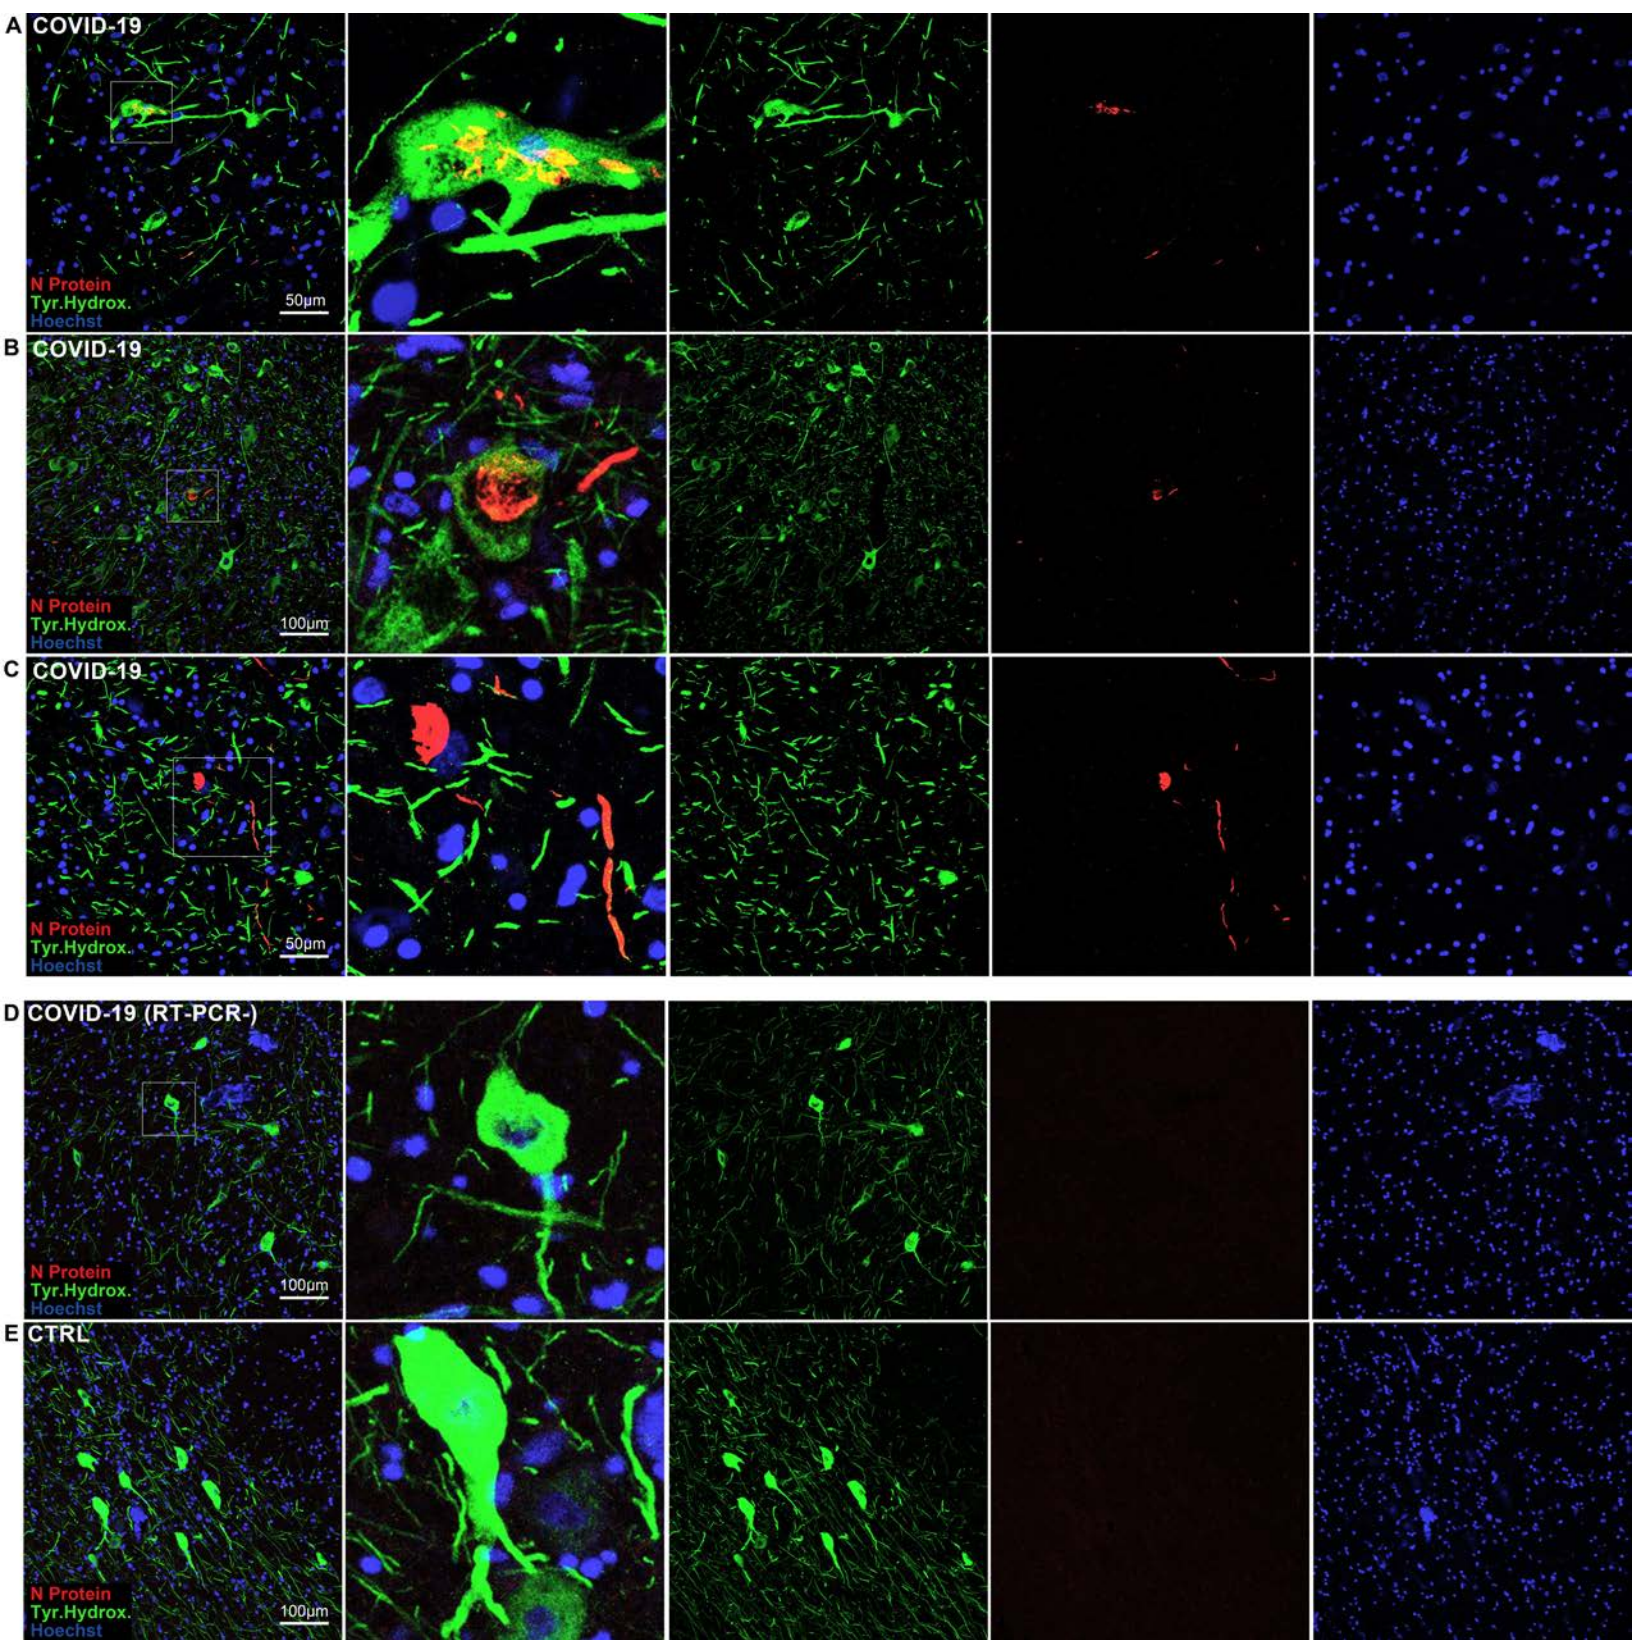

| ID  | Age | Sex | Hospitalization (days) | ICU | Intensive Oxygen Therapy | Anti-thrombotic medication | Steroid Medication | Hypertension | PMI | Antemortem Head CT                                                                                                                     | Neurological signs                                                             | Neuropathological evaluation                                                                | Brainstem Hypoxic Damage | Microthrombosis (NON-CNS) | Cause of Death                                                     |
|-----|-----|-----|------------------------|-----|--------------------------|----------------------------|--------------------|--------------|-----|----------------------------------------------------------------------------------------------------------------------------------------|--------------------------------------------------------------------------------|---------------------------------------------------------------------------------------------|--------------------------|---------------------------|--------------------------------------------------------------------|
| #1  | 87  | F   | 2                      | N   | N                        | Y                          | Y                  | Y            | 4   | NA                                                                                                                                     | Cognitive decline                                                              | AD neuropathological changes, CAA                                                           | Mild                     | Lungs, liver              | Diffuse alveolar damage                                            |
| #2  | 92  | F   | 5                      | N   | N                        | N                          | Y                  | N            | 1   | NA                                                                                                                                     | Cognitive decline, Alzheimer type                                              | AD neuropathological changes, CAA                                                           | Mild                     | Lungs                     | Diffuse aveolar damage, intestinal infarction                      |
| #3  | 83  | M   | 8                      | N   | N                        | Y                          | Y                  | Y            | 2   | Cerebral and cerebellar atrophy, chronic ischemic vascular disease                                                                     | Frontoparietal ischemic insult (old) episodes of hepatic encephalopathy (HCV+) | Multi-infarct dementia, arteriosclerosis                                                    | Moderate                 | No                        | Diffuse alveolar damage, hepatic cyrrhosis                         |
| #4  | 97  | F   | 9                      | N   | N                        | Y                          | Y                  | Y            | 5   | NA                                                                                                                                     | Vascular dementia                                                              | Vascular dementia, arterioscelrosis, diffuse hypoxic/ischaemic damage                       | Mild                     | Lungs                     | Diffuse alveolar damage, cardiac amyloidosis                       |
| #5  | 78  | F   | 15                     | N   | N                        | Y                          | Y                  | Y            | 5   | NA                                                                                                                                     | NA                                                                             | Early AD neuropathological changes, diffuse hypoxic/ischaemic damage                        | Mild                     | Liver                     | Pneumonia, aspergillus bronchopneumonia                            |
| #6  | 74  | M   | 13                     | Y   | Y                        | Y                          | Y                  | Y            | 4   | Vascular calcification, expansive lesion of the right frontal lobe and right cerebellar hemisphere in patient with pulmonary neoplasia | NA                                                                             | Small cell metastatic lung carcinoma with right cerebellar and frontal metastases           | Mild                     | No                        | Small cell metastatic lung carcinoma, diffuse alveolar damage      |
| #7  | 58  | F   | 11                     | Y   | Y                        | Y                          | N                  | N            | 2   | Extensive ischaemic lesion of the territory of the right PCA, occlusion of the PCA                                                     | NA                                                                             | Medial temporal lobe infarction                                                             | Moderate                 | No                        | Acute myocardial infarction, cardiogenic shock                     |
| #8  | 50  | M   | 1                      | N   | N                        | N                          | N                  | N            | 3   | NA                                                                                                                                     | NA                                                                             | Arteriosclerosis, diffuse hypoxic/ischaemic damage                                          | No detectable changes    | No                        | Coronary atherosclerosis and myocardiosclerosis                    |
| #9  | 81  | F   | 30                     | N   | N                        | N                          | N                  | Y            | 3   | Ischaemic regions in the MCA territory and diffuse cerebral and cerebellar atrophy due to chronic ischaemic vascular disease.          | Soporuous status                                                               | Mixed dementia with AD neuropathological changes, CAA and chronic ischemic vascular disease | Moderate                 | Lungs, liver              | Atherosclerotic aortic aneurysm, pneumonia.                        |
| #10 | 60  | M   | 30                     | Y   | Y                        | Y                          | Y                  | N            | 3   | NA                                                                                                                                     | NA                                                                             | Diffuse hypoxic/ischaemic damage                                                            | Mild                     | Heart                     | Pneumonia with emphysema.                                          |
| #11 | 55  | M   | 15                     | Y   | Y                        | Y                          | Y                  | N            | 2   | NA                                                                                                                                     | NA                                                                             | CNS microthromboses, haemorrhagic injury in the territory of the right MCA                  | Moderate                 | No                        | Pulmonary thromboembolism with infarcts.                           |
| #12 | 62  | M   | 27                     | Y   | Y                        | Y                          | Y                  | N            | 2   | NA                                                                                                                                     | NA                                                                             | Arteriosclerosis, diffuse hypoxic/ischaemic damage                                          | Mild                     | Lungs                     | Pneumonia with hemorrhages. Intestinal and hepatic infarcts.       |
| #13 | 73  | M   | 21                     | Y   | Y                        | Y                          | Y                  | Y            | 2   | NA                                                                                                                                     | NA                                                                             | Diffuse hypoxic/ischaemic damage                                                            | Moderate                 | No                        | Pneumothorax, Pneumonia, right pleurodesis,                        |
| #14 | 58  | F   | 24                     | Y   | Y                        | Y                          | Y                  | Y            | 1   | Right anisocoria                                                                                                                       | No relevant signs                                                              | Diffuse hypoxic/ischaemic damage                                                            | Mild                     | Lungs                     | Pneumonia. Necrotic-haemorrhagic pancreatitis. Multiorgan failure. |
| #15 | 49  | F   | 3                      | Y   | Y                        | Y                          | N                  | N            | 2   | Confusion and hallucinations; CSF Streptococcus Pneumoniae +                                                                           | NA                                                                             | Acute purulent meningitis, post-anoxic pathology                                            | Moderate                 | No                        | Acute purulent meningitis. Post-anoxic cerebral death.             |
| #16 | 72  | M   | 10                     | Y   | Y                        | Y                          | Y                  | Y            | 4   | Hypostenia, dizziness, anosmia. Sudden fall.                                                                                           | NA                                                                             | Diffuse hypoxic/ischaemic damage                                                            | Severe                   | No                        | Consolidative pneumonia. Hypertensive heart disease.               |

|     |    |   |    |   |   |    |    |   |    |                                                                                                                         |                   |                                                                                                                   |                                |       |                                                                                                       |
|-----|----|---|----|---|---|----|----|---|----|-------------------------------------------------------------------------------------------------------------------------|-------------------|-------------------------------------------------------------------------------------------------------------------|--------------------------------|-------|-------------------------------------------------------------------------------------------------------|
| #17 | 72 | M | 38 | N | N | N  | Y  | N | 1  | NA                                                                                                                      | NA                | CNS microthromboses, extensive haemorrhagic injury of the right cerebellar hemisphere, ischaemic vascular disease | Mild                           | No    | Multivascular obstructive coronary atherosclerosis. Left pulmonary infarct.                           |
| #18 | 82 | M | 6  | N | N | N  | Y  | Y | 3  | Acute neurological event: Anisocoria, non responding                                                                    | NA                | CNS microthromboses, ischemic vascular disease                                                                    | Mild                           | No    | Lobar pneumonia                                                                                       |
| #19 | 40 | F | 1  | N | N | NA | NA | Y | ND | NA                                                                                                                      | NA                | CNS microthromboses, diffuse hypoxic/ischaemic damage                                                             | Moderate (medulla not sampled) | NA    | Diffuse alveolar damage                                                                               |
| #20 | 68 | M | NA | N | N | NA | NA | Y | ND | NA                                                                                                                      | NA                | CNS microthromboses, diffuse hypoxic/ischaemic damage                                                             | Severe (medulla not sampled)   | NA    | Diffuse alveolar damage                                                                               |
| #21 | 73 | M | 5  | Y | Y | Y  | Y  | N | 5  | NA                                                                                                                      | NA                | CNS microthromboses, cortical and subcortical haemorrhages, global ischaemia                                      | Moderate                       | Lungs | Diffuse alveolar damage, Platelet/fibrin microthrombosis                                              |
| #22 | 77 | F | 34 | N | N | N  | N  | Y | 5  | No signs                                                                                                                | NA                | CNS microthromboses, ischemic vascular disease                                                                    | Moderate to severe             | Lungs | Chronic emphysema, diffuse alveolar damage and platelet/fibrin microthromboses.                       |
| #23 | 84 | M | 12 | Y | Y | Y  | Y  | Y | 4  | Chronic ischaemic vascular disease                                                                                      | Cognitive decline | AD neuropathological changes, Parkinson's Disease, CNS microthromboses, ischemic vascular disease                 | Moderate                       | Lungs | Chronic emphysema, bacterial pneumonia, diffuse alveolar damage lung platelet/fibrin microthrombosis. |
| #24 | 89 | F | 1  | N | N | N  | N  | Y | 5  | Chronic ischaemic vascular disease, territorial ischaemic injury (right occipital lobe, caudate nucleus and cerebellum) | Cognitive decline | AD neuropathological changes, CNS microthromboses, diffuse hypoxic/ischaemic damage                               | Moderate                       | Lungs | Chronic emphysema, diffuse alveolar damage and platelet/fibrin microthromboses                        |

**Table 1. Clinical data of the COVID-19 Group.**

| ID  | Age | Sex | Hospitalization (days) | Hypertension | PMI | Antemortem Head CT                                   | Neurological signs                | Neuropathological evaluation                                                                 | Brainstem Hypoxic damage            | Microthrombosis (NON-CNS) | Cause of Death                                                    |
|-----|-----|-----|------------------------|--------------|-----|------------------------------------------------------|-----------------------------------|----------------------------------------------------------------------------------------------|-------------------------------------|---------------------------|-------------------------------------------------------------------|
| #1  | 83  | M   | 10                     | Y            | 5   | Cerebral atrophy, Chronic ischaemic vascular disease | Cognitive decline                 | Mixed dementia with AD neuropathological changes ad chronic ischaemic vascular disease       | Moderate                            | No                        | Pneumonia, respiratory insufficiency, ischaemic heart disease     |
| #2  | 74  | M   | 2                      | Y            | 4   | Vascular calcification, ischaemic heart disease      | NA                                | Chronic ischaemic vascular disease                                                           | Mild                                | No                        | Ischaemic heart disease.                                          |
| #3  | 40  | M   | 1                      | N            | 4   | No signs                                             | No signs                          | No detectable microscopical changes                                                          | No detectable microscopical changes | No                        | Haemorrhagic Shock                                                |
| #4  | 79  | F   | 31                     | Y            | 3   | Cerebral atrophy, Chronic ischaemic vascular disease | Cognitive decline, Alzheimer type | AD neuropathological changes, CAA, ischemic vascular disease                                 | Mild                                | No                        | Pentalobar pneumonia, respiratory insufficiency                   |
| #5  | 62  | M   | 22                     | Y            | 5   | NA                                                   | NA                                | Diffuse hypoxic/ischaemic damage                                                             | Mild                                | No                        | Pneumonia, respiratory insufficiency                              |
| #6  | 76  | M   | 15                     | Y            | 6   | NA                                                   | NA                                | Ischaemic vascular disease, diffuse hypoxic/ischaemic damage                                 | Mild                                | No                        | Pneumonia, chronic ischaemic vascular disease                     |
| #7  | 75  | M   | 12                     | Y            | 4   | NA                                                   | NA                                | Diffuse hypoxic/ischaemic damage                                                             | Mild                                | No                        | Pneumonia, ischaemic heart disease                                |
| #8  | 78  | F   | 8                      | Y            | 3   | No                                                   | NA                                | Diffuse hypoxic/ischaemic damage                                                             | Mild                                | No                        | Pneumonia, ischaemic heart disease                                |
| #9  | 71  | F   | 40                     | Y            | 3   | NA                                                   | NA                                | Diffuse hypoxic/ischaemic damage                                                             | Moderate to severe                  | No                        | Acute respiratory failure, septic shock, peritonitis              |
| #10 | 46  | F   | 15                     | N            | 4   | No signs                                             | No signs                          | Diffuse hypoxic/ischaemic damage                                                             | No detectable microscopical changes | No                        | Respiratory insufficiency, multiorgan failure, cervical neoplasia |
| #11 | 75  | F   | 20                     | Y            | 5   | Chronic Ischaemic Vascular disease, Cerebral atrophy | NA                                | Vascular dementia, ischaemic vascular disease, diffuse hypoxic/ischaemic damage              | Moderate                            | No                        | Pneumonia, acute respiratory failure, candidosis                  |
| #12 | 80  | F   | 8                      | Y            | 4   | Cerebral atrophy                                     | Cognitive decline, Alzheimer type | AD neuropathological changes, diffuse hypoxic/ischaemic damage                               | Moderate                            | No                        | Pentalobar pneumonia, respiratory insufficiency                   |
| #13 | 81  | F   | NA                     | Y            | 3   | NA                                                   | NA                                | Diffuse hypoxic/ischaemic damage                                                             | Mild                                | No                        | Pneumonia, acute respiratory failure                              |
| #14 | 63  | F   | NA                     | N            | 3   | No signs                                             | No signs                          | Diffuse hypoxic/ischaemic damage                                                             | Mild                                | No                        | Ischaemic heart disease                                           |
| #15 | 70  | M   | 38                     | Y            | 5   | Chronic ischaemic vascular disease                   | NA                                | Ischaemic vascular disease, diffuse hypoxic/ischaemic damage                                 | Moderate                            | No                        | Bilateral pneumonia, respiratory insufficiency.                   |
| #16 | 81  | M   | 10                     | Y            | 4   | Cerebral atrophy                                     | Cognitive decline, Alzheimer type | Mixed AD neuropathological changes and Lewy Body pathology, diffuse hypoxic/ischaemic damage | Moderate                            | No                        | Pneumonia, respiratory insufficiency                              |
| #17 | 75  | M   | 58                     | Y            | 6   | Cerebral atrophy                                     | NA                                | Vascular dementia, ischaemic vascular disease, diffuse hypoxic/ischaemic damage              | Moderate                            | No                        | Pneumonia, respiratory insufficiency.                             |



|     |    |   |    |   |   |                  |                   |                                                                |          |    |                                |
|-----|----|---|----|---|---|------------------|-------------------|----------------------------------------------------------------|----------|----|--------------------------------|
| #18 | 87 | M | 30 | Y | 6 | Cerebral atrophy | Cognitive decline | AD neuropathological changes, diffuse hypoxic/ischaemic damage | Moderate | No | Pneumonia, multiorgan failure. |
|-----|----|---|----|---|---|------------------|-------------------|----------------------------------------------------------------|----------|----|--------------------------------|

**Table 2. Clinical data of the Control Group**
